# 1 Human intracranial pulsatility during the cardiac 2 cycle: a computational modelling framework

3 Marius Causemann<sup>1,\*</sup>, Vegard Vinje<sup>1</sup>, and Marie E. Rognes<sup>1, 2</sup>

4 <sup>1</sup>Department of Numerical Analysis and Scientific Computing, Simula Research Laboratory, Kristian Augusts gate  
5 23, 0164 Oslo, Norway

6 <sup>2</sup>Department of Mathematics, University of Bergen, P. O. Box 7803, 5020 Bergen, Norway

7 \*Corresponding author (mariusca@simula.no)

## 8 ABSTRACT

**Background:** Today's availability of medical imaging and computational resources set the scene for high-fidelity computational modelling of brain biomechanics. The brain and its environment feature a dynamic and complex interplay between the tissue, blood, cerebrospinal fluid (CSF) and interstitial fluid (ISF). Here, we design a computational platform for modelling and simulation of intracranial dynamics, and assess the models' validity in terms of clinically relevant indicators of brain pulsatility.

**Methods:** We develop finite element models of fully coupled cardiac-induced pulsatile CSF flow and tissue motion in the human brain environment. The three-dimensional model geometry is derived from magnetic resonance images (MRI), features a high level of detail including the brain tissue, the ventricular system, and the cranial subarachnoid space (SAS). We model the brain parenchyma at the organ-scale as an elastic medium permeated by an extracellular fluid network and describe flow of CSF in the SAS and ventricles as viscous fluid movement. Representing vascular expansion during the cardiac cycle, a pulsatile net blood flow distributed over the brain parenchyma acts as the driver of motion. Additionally, we investigate the effect of model variations on a set of clinically relevant quantities of interest.

**Results:** Our model predicts a complex interplay between the CSF-filled spaces and poroelastic parenchyma in terms of ICP, CSF flow, and parenchymal displacements. Variations in the ICP are dominated by their temporal amplitude, but with small spatial variations in both the CSF-filled spaces and the parenchyma. Induced by ICP differences, we find substantial ventricular and cranial-spinal CSF flow, some flow in the cranial SAS, and small pulsatile ISF velocities in the brain parenchyma. Moreover, the model predicts a funnel-shaped deformation of parenchymal tissue in dorsal direction at the beginning of the cardiac cycle.

**Conclusions:** Our model accurately depicts the complex interplay of ICP, CSF flow and brain tissue movement and is well-aligned with clinical observations. It offers a qualitative and quantitative platform for detailed investigation of coupled intracranial dynamics and interplay, both under physiological and pathophysiological conditions.

10 **Keywords:** Intracranial pulsatility, cerebral blood flow, intracranial pressure, cerebrospinal fluid, interstitial  
11 fluid, finite element model, poroelasticity

## 12 Introduction

13 The pulsating brain environment features a unique and dynamic interplay between blood influx and efflux, cere-  
14 brospinal fluid (CSF) flow in and between the cranial and spinal compartment, intracranial pressures (ICPs), brain  
15 tissue movement and interstitial fluid (ISF) flow. Alterations in the dynamics of ICP or CSF flow are associated  
16 with central nervous system disorders [60] such as hydrocephalus [32, 44], Alzheimer's disease and multiple  
17 sclerosis [47]. Moreover, better understanding of CSF flow characteristics could play an important role for targeted  
18 drug delivery [41]. Progress in magnetic resonance imaging (MRI) has allowed for non-invasive measurements of  
19 CSF flow, blood flow, and brain tissue deformation [4, 48]. Over the last decade, computational modelling of brain  
20 mechanics have emerged as a promising complementary tool to obtain high fidelity and high resolution models and  
21 predictions of intracranial dynamics [35].

22 Computational studies of intracranial pulsatility have mainly focused on either the brain parenchyma [26, 25,

23 58] or the flow of CSF through the ventricular system and the spinal and cerebral subarachnoid spaces (SAS) [33, 29,  
24 53, 59]. Such *decoupled* approaches do not fully account for the close interactions between the brain tissue and the  
25 surrounding CSF, and the potential exchange between CSF and ISF. In contrast, *coupled* fluid-structure interaction  
26 models allow for simultaneous computation of flow and pressure in the CSF-spaces as well as the solid displacement  
27 and stresses in the brain parenchyma. Linninger et al. [34] proposed a model of CSF flow in the SAS and ventricles  
28 coupled with porous media flow through the brain parenchyma driven by an oscillatory inflow boundary condition at  
29 the choroid plexus. Sweetman et al. [51] introduced a 3D model of CSF flow with fluid-structure interaction driven  
30 by a moving lateral ventricle wall. Tully and Ventikos [54] investigated the coupling of poroelasticity and free fluid  
31 flow using an idealized brain model. Gholampour [23] used a coupled model of CSF flow and brain viscoelasticity –  
32 again driven by a CSF source in the lateral ventricles to compare flow patterns in healthy and hydrocephalic subjects.

33 Based on multi-modal MR imaging, Balédent [4] proposed that cardiac cycle-induced intracranial pulsatility is  
34 driven by the following sequence of events. During systole, arterial blood flow into the brain exceeds the venous  
35 outflow, the brain expands, ICP increases, and CSF is displaced into the spinal canal. Subsequently, during diastole,  
36 venous outflow dominates the vascular dynamics, leading to a decrease of ICP and a reversal of CSF flow. A key  
37 question is whether and to what extent computational models can integrate this view of intracranial dynamics, driven  
38 by the cardiac-induced expansion of blood vessels in the brain tissue [4], with clinical observations of ICP [19], ICP  
39 differences [20, 59], and CSF flow.

40 In this paper, we therefore propose a computational model of intracranial dynamics coupling the pulsatile motion  
41 of CSF, brain tissue and ISF during the cardiac cycle. We represent the brain parenchyma at the organ-scale as  
42 an elastic medium permeated by an extracellular network saturated by CSF/ISF. Flow of CSF in the SAS and  
43 ventricles is modelled as a viscous fluid under low Reynolds numbers i.e. via the Stokes equations. Crucially, we  
44 employ a pulsatile net blood flow distributed over the brain parenchyma as the driver of motion. This fully coupled  
45 computational model enables studies of the entire intracranial system dynamics. Specifically, the model predicts the  
46 brain displacement, intracranial pressures within the parenchyma, in the SAS, and in the ventricular system, and  
47 CSF and ISF flows. Several model variations (e.g. parameter regimes) were also tested to assess the sensitivity to  
48 different parameters. Overall, our computational results agree well with clinical observations of ICP, stroke volumes,  
49 and brain displacements, and thus introduces a promising computational approach to study intracranial pulsatility  
50 driven by intraparenchymal blood flow.

## 51 **Methods**

### 52 **Domains and boundaries**

53 We represent the brain parenchyma as a three-dimensional domain  $\Omega_p$ , and the surrounding CSF-filled spaces by  $\Omega_f$   
54 (Figure 1a). These two domains share a common boundary  $\Sigma = \Omega_f \cap \Omega_p$  with normal vector  $\mathbf{n}$ , pointing from  $\Omega_f$   
55 to  $\Omega_p$  on  $\Sigma$  and outwards on the boundary  $\partial\Omega$ . Further,  $\Gamma_{\text{skull}}$  denotes the outer boundary of the CSF space where  
56 the rigid skull encloses the cranial cavity (Figure 1a). The lower boundary of the domain (at the C3 level) is split  
57 into two segments: the caudal continuation of the spinal cord is labeled  $\Gamma_{SC}$ , while  $\Gamma_{SAS}$  describes the boundary  
58 to the spinal SAS. To obtain a computational mesh of these domains, we manually segmented the *full head MRI*  
59 *scan* data set provided by Slicer3D [22, 30], and extracted the constituents of the ventricular system, the cranial  
60 SAS and the brain parenchyma (Figure 1c). The surfaces of the segmented regions were meshed using the Surface  
61 Volume Meshing Toolkit (SVMTK) [57]. The volumes and diameters of the relevant mesh substructures, as listed  
62 in Table 1, are within clinically reported ranges. The computational mesh consists of 4526016 mesh cells, 796303  
63 mesh vertices and a maximal (minimal) cell diameter of 6.7 mm (0.2 mm).

### 64 **Governing equations**

**The brain parenchyma** We regard brain tissue as a linear poroelastic medium permeated by a single fluid  
network representing an extracellular CSF/ISF-space. The equations of linear poroelasticity express conservation of  
momentum for the solid elastic matrix and the mass conservation of a diffusive flow within the medium [9]. Due  
to its robustness in case of materials close to the incompressible limit or with low storage capacity, we chose a  
three-field formulation, based on the displacement  $\mathbf{d}$ , fluid (pore) pressure  $p_p$  and the additional total pressure  $\phi$ ,

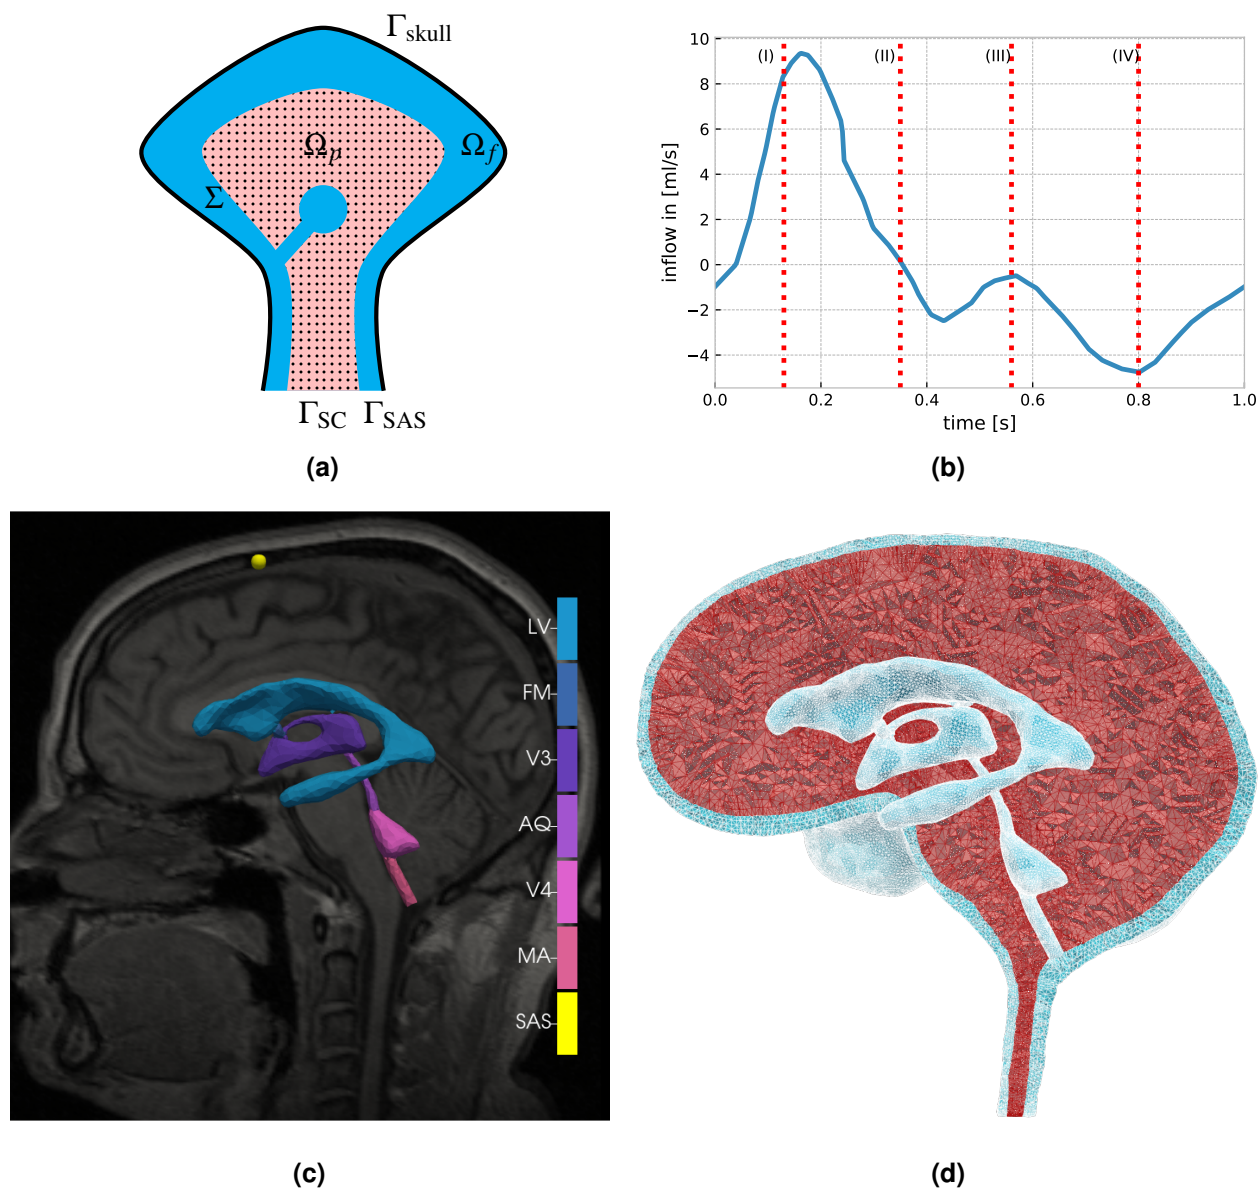

**Figure 1.** **a)** Sketch of the domains representing the brain parenchyma ( $\Omega_p$ , pink) and the CSF-filled spaces ( $\Omega_f$ , blue). The interface of both domains is denoted by  $\Sigma$ . Additionally, the boundaries  $\Gamma_{skull}$  at the skull,  $\Gamma_{SC}$  at the spinal cord and  $\Gamma_{SAS}$  at the spinal SAS are highlighted; **b)** Net blood inflow during the cardiac cycle with four different phases: (I) early systole - high net blood inflow; (II) end of net blood inflow phase; (III) brain equilibrium phase (arterial inflow and venous outflow almost match); (IV) high net outflow of blood (data extracted from Balédent [4]); **c)** The MRI image used for the mesh generation and the segmented parts of the ventricular system: LV - lateral ventricles, FM - foramina of Monro, V3 - third ventricle, AQ - aqueduct of Sylvius, V4 - fourth ventricle, MA - median aperture, SAS - probe point in the subarachnoid space; **d)** sagittal view of the mesh, displaying the ventricular system, cranial SAS (both light blue) brain parenchyma (red).

| Substructure dimension        | This study | Literature value                             | Reference                         |
|-------------------------------|------------|----------------------------------------------|-----------------------------------|
| Lateral ventricles volume     | 24.01 ml   | 9.82 ml (normal)<br>250.2 ml (hydrocephalic) | Linninger et al. [34]             |
| Third ventricle volume        | 3.60 ml    | 2.48 ml                                      | Linninger et al. [34]             |
| Fourth ventricle volume       | 2.69 ml    | 3.31 ml                                      | Linninger et al. [34]             |
| Subarachnoid space volume     | 292.08 ml  | 179 ml (only cranial)                        | Chazen et al. [14]                |
| Aqueduct diameter             | 2.88 mm    | 1.5 to 3.0 mm                                | Haines and Mihailoff [27]         |
| Spinal canal (C3) diameter    | 12 mm      | 9.4 to 17.2 mm                               | Ulbrich et al. [55]               |
| Spinal coord (C3) diameter    | 7 mm       | 6.0 to 9.6 mm                                | Ulbrich et al. [55]               |
| Brain parenchyma total volume | 1369.54 ml | 1130 ml (women)<br>1260 ml (men)             | Cosgrove, Mazure, and Staley [16] |

**Table 1.** Comparison of the generated computational head model and experimentally determined values in healthy subjects with respect to the dimensions of the brain's substructures; C3 is the third cervical vertebra level of the spine

which is defined as  $\phi = \alpha p_p - \lambda \operatorname{div} \mathbf{d}$  [31, 39]. With the infinitesimal strain tensor  $\varepsilon(\mathbf{d}) = \frac{1}{2}(\nabla \mathbf{d} + \nabla \mathbf{d}^T)$  and a volume source term  $g$ , the equations read as follows:

$$-\operatorname{div}[2\mu_s \varepsilon(\mathbf{d}) - \phi \mathbf{I}] = 0 \quad \text{in } \Omega_p \times (0, T), \quad (1a)$$

$$\phi - \alpha p_p + \lambda \operatorname{div} \mathbf{d} = 0 \quad \text{in } \Omega_p \times (0, T), \quad (1b)$$

$$\left(c + \frac{\alpha^2}{\lambda}\right) \partial_t p_p - \frac{\alpha}{\lambda} \partial_t \phi - \operatorname{div} \left(\frac{\kappa}{\mu_f} \nabla p_p\right) = g \quad \text{in } \Omega_p \times (0, T). \quad (1c)$$

65 Here,  $\kappa$  represents the permeability,  $c$  the specific storage coefficient, and  $\alpha$  the Biot-Willis coefficient. The identity  
66 operator is  $\mathbf{I}$ . The linear isotropic solid matrix is parameterized with the Lamé constants  $\mu_s$  and  $\lambda$ , while the fluid  
67 permeating the pores has viscosity  $\mu_f$ .

**CSF compartments** We model the flow of CSF in the ventricular system and SAS by the time-dependent Stokes equations for the CSF velocity  $u_f$  and fluid pressure  $p_f$ . The Stokes equations represent flow under low Reynolds numbers typically observed in the CSF compartments; Howden et al. [29] report an average Reynolds number of  $Re_{av} = 0.39$  with a maximum value of  $Re_{max} = 15$  in the CSF-filled spaces of the cranium during the cardiac cycle. Under these assumptions, the equations reads as follows:

$$\rho_f \partial_t \mathbf{u} - \operatorname{div}[2\mu_f \varepsilon(\mathbf{u}) - p_f \mathbf{I}] = 0 \quad \text{in } \Omega_f \times (0, T), \quad (2a)$$

$$\operatorname{div} \mathbf{u} = 0 \quad \text{in } \Omega_f \times (0, T), \quad (2b)$$

68 with the strain rate tensor  $\varepsilon(\mathbf{u}) = \frac{1}{2}(\nabla \mathbf{u} + \nabla \mathbf{u}^T)$ , constant CSF density  $\rho_f$ , and constant CSF viscosity  $\mu_f$ .

### 69 Net blood flow as a driver of pulsatility

70 We induce motion in the system via a vascular expansion through net flow of blood into the brain parenchyma,  
71 modelled by a pulsatile source term  $g$  in (1c). We define net blood flow as the difference between arterial blood  
72 inflow and venous blood outflow over time. As Biot's equations include only one fluid network, we treat the net  
73 blood flow as a source term in this single fluid compartment. This simplification can be justified by the similarity of  
74 the effect of an inflow of blood and/or ISF: both lead to a volumetric expansion of the brain parenchyma and an  
75 increase of fluid pressure. We let  $g$  vary in time, but be spatially uniform, and employ a measured net blood inflow  
76 time series from Balédent [4] (Figure 1b). The rapid inflow of arterial blood during early systole (phase I) increases



77 the cranial blood volume, until venous outflow balances the arterial inflow, ending the net inflow of blood (phase II).  
 78 Next, after a brief equilibrium (phase III), the venous outflow exceeds the arterial inflow (phase IV) and sets the  
 79 cerebral blood circulation up for the next cycle.

## 80 **Transmission, boundary and initial conditions**

81 We augment the above governing equations by the following transmission (interface), boundary and initial conditions.

**Transmission Conditions** Based on first principles, we require the following equations to hold on the interface  $\Sigma$  between the porous and the fluid domain:

$$\mathbf{u} \cdot \mathbf{n} = \left( \partial_t \mathbf{d} - \frac{\kappa}{\mu_f} \nabla p_p \right) \cdot \mathbf{n} \quad \text{on } \Sigma \times (0, T), \quad (3a)$$

$$(2\mu_f \boldsymbol{\varepsilon}(\mathbf{u}) - p_f \mathbf{I}) \mathbf{n} = (2\mu_s \boldsymbol{\varepsilon}(\mathbf{d}) - \phi \mathbf{I}) \mathbf{n} \quad \text{on } \Sigma \times (0, T), \quad (3b)$$

$$-\mathbf{n} \cdot (2\mu_f \boldsymbol{\varepsilon}(\mathbf{u}) - p_f \mathbf{I}) \mathbf{n} = p_p \quad \text{on } \Sigma \times (0, T), \quad (3c)$$

$$-\mathbf{n} \cdot (2\mu_f \boldsymbol{\varepsilon}(\mathbf{u}) - p_f \mathbf{I}) \boldsymbol{\tau}_i = \frac{\gamma \mu_f}{\sqrt{\kappa}} (\mathbf{u} - \partial_t \mathbf{d}) \cdot \boldsymbol{\tau}_i \quad \text{on } \Sigma \times (0, T), \quad i = 1, 2. \quad (3d)$$

82 Here, to complement the normal  $\mathbf{n}$ ,  $\boldsymbol{\tau}_i$  ( $i = 1, 2$ ) we define orthogonal tangent vectors to the interface, and  $\gamma > 0$  is the  
 83 slip rate coefficient, which is a dimensionless constant depending only on the structure of the porous medium. Here,  
 84 (3a) enforces continuity of the normal flux on the interface, (3b) conserves momentum, while (3c) accounts for the  
 85 balance of total normal stress. The last interface condition (3d) is the Beavers-Joseph-Saffman (BJS) condition,  
 86 which states that the jump in the tangential velocities across the interface is proportional to the shear stress on the  
 87 free flow side of the interface [7, 46, 37].

**Boundary Conditions** Assuming a rigid skull, we set no-slip conditions on the skull boundary  $\Gamma_{\text{skull}}$ :

$$\mathbf{u} = \mathbf{0} \quad \text{on } \Gamma_{\text{skull}} \times (0, T).$$

For the spinal cord boundary  $\Gamma_{\text{SC}}$ , we assume no displacement and no flux:

$$\mathbf{d} = \mathbf{0} \quad \text{and} \quad \frac{\kappa}{\mu_f} \nabla p_p \cdot \mathbf{n} = 0 \quad \text{on } \Gamma_{\text{SC}} \times (0, T).$$

To represent the compliance of the spinal compartment, we assume an exponential relationship between ICP and additional volume [36, 61, 52]:

$$(2\mu_f \boldsymbol{\varepsilon}(\mathbf{u}) - p_f \mathbf{I}) \cdot \mathbf{n} = -\mathbf{n} p_0 \cdot 10^{\Delta V_{\text{out}}(t)/\text{PVI}_{\text{SC}}} \quad \text{on } \Gamma_{\text{SAS}} \times (0, T).$$

The pressure-volume index ( $\text{PVI}_{\text{SC}}$ ) represents a clinical measure of the compliance of the spinal compartment,  $p_0$  is the initial pressure of the system and  $\Delta V_{\text{out}}(t)$  is the total additional volume of CSF in the spinal compartment. The latter equals the volume of CSF that has left the domain over the corresponding part of the boundary  $\Gamma_{\text{SAS}}$ , and is calculated as follows:

$$\Delta V_{\text{out}}(t) = \int_0^t \int_{\Gamma_{\text{SAS}}} \mathbf{u} \cdot \mathbf{n} \, ds \, dt.$$

88 This allows for the pulsatile motion of CSF in and out of the domain.

**Initial Conditions** Finally, we assume that the system is initially at rest with an initial pore pressure  $p_0$ :

$$\mathbf{u} = \mathbf{0} \quad \text{on } \Omega_f \times \{0\},$$

$$\mathbf{d} = \mathbf{0}, \quad p_p = p_0 \quad \text{on } \Omega_p \times \{0\}.$$

| Parameter                    | Symbol                   | Value(s)                                                      | Unit                       | Reference                                          | Value used in this study |
|------------------------------|--------------------------|---------------------------------------------------------------|----------------------------|----------------------------------------------------|--------------------------|
| Young modulus                | $E$                      | $1895 \pm 592$ (wm)<br>$1389 \pm 289$ (gm)<br>5000            | Pa                         | Budday et al. [11]<br>-<br>Smith and Humphrey [49] | 1500                     |
| Poisson Ratio                | $\nu$                    | 0.479                                                         | -                          | Smith and Humphrey [49]                            | 0.479                    |
| Density (brain tissue)       | $\rho_s$                 | 1081                                                          | $\text{kg/m}^3$            | Barber, Brockway, and Higgins [6]                  | 1081                     |
| Density (CSF)                | $\rho_f$                 | 1007                                                          | $\text{kg/m}^3$            | Barber, Brockway, and Higgins [6]                  | 1007                     |
| Biot-Willis coefficient      | $\alpha$                 | 1.0                                                           | -                          | Smith and Humphrey [49]                            | 1.0                      |
| Permeability                 | $\kappa$                 | $10^{-17} - 4 \cdot 10^{-15}$                                 | $\text{m}^2$               | Holter et al. [28]                                 | $10^{-16}$               |
| Storage coefficient          | $c$                      | $4.47 \cdot 10^{-7}$<br>$3 \cdot 10^{-4} - 1.5 \cdot 10^{-5}$ | $\text{Pa}^{-1}$           | Chou et al. [15]<br>Guo et al. [25]                | $10^{-6}$                |
| CSF/ISF viscosity            | $\mu_f$                  | $0.7 \cdot 10^{-3} - 10^{-3}$                                 | $\text{Pa} \cdot \text{s}$ | Bloomfield, Johnston, and Bilston [10]             | $0.8 \cdot 10^{-3}$      |
| Spinal pressure-volume index | $\text{PVI}_{\text{SC}}$ | $2.94 \pm 1.05$<br>$3.9 \pm 2.5$                              | ml                         | Tain et al. [52]<br>Wählin et al. [61]             | 3                        |
| Initial ICP                  | $p_0$                    | 5 -15                                                         | mmHg                       | Rangel-Castillo, Gopinath, and Robertson [43]      | 4.5                      |
| Slip-rate coefficient        | $\gamma$                 | 0.01 - 5                                                      | -                          | Ehrhardt [18]                                      | 1                        |

**Table 2.** Summary of material parameters, including references to values from previous studies.

## 89 Material parameters

90 Material parameters were selected based on literature values and are summarized in Table 2.

## 91 Quantities of interest

92 Primary clinical quantities of interest are the ICP and CSF flow rates and volumes in the foramen magnum or  
93 across the aqueduct [60]. In our computational model, we identify the ICP as the (fluid) pressure  $p_f$  in the CSF  
94 compartment(s) and as the total pressure  $\phi$  in the parenchyma, which incorporates both the pore pressure and  
95 the stress exercised by the elastic matrix. We place virtual/computational pressure probe points inside the lateral  
96 ventricles, in the cranial SAS at the upper convexity of the skull, and inside the fourth ventricle (Figure 1c). Flow  
97 rates within the ventricular system and into the spinal compartment are obtained by spatial integration of the  
98 computed CSF flow across boundaries between the different parts of the ventricular system or across the spinal  
99 external boundary, respectively. Specifically, we define the following set of quantities of interest:

- 100 i) the peak volumetric flow rate in the aqueduct,
- 101 ii) the aqueduct stroke volume, corresponding to the net volume of fluid pulsating back and forth in the aqueduct  
102 over the cardiac cycle (maximum of the cumulative flow volume),
- 103 iii) the peak tissue displacement,
- 104 iv) the (peak) transmante pressure gradient, computed as the (peak) pressure difference between the virtual probe  
105 points in the cranial SAS and the lateral ventricles and divided by the distance between these points,
- 106 v) the temporal nadir-to-peak (i.e, diastolic to systolic) amplitude of pressure in the lateral ventricles,
- 107 vi) the spinal stroke volume, corresponding to the net volume of fluid pulsating back and forth into the spinal  
108 compartment over the cardiac cycle.

109 Results are reported from the last of three cardiac cycles to limit the influence of the initial data.

| Model    | modified parameter    | value                         | interpretation                          |
|----------|-----------------------|-------------------------------|-----------------------------------------|
| Standard | -                     | -                             |                                         |
| A        | pressure-volume index | $PVI = 10 \text{ ml}$         | greater spinal compliance               |
| B        | Young Modulus         | $E = 3000 \text{ Pa}$         | stiffer brain parenchyma                |
| C        | Poisson ratio         | $\nu = 0.4$                   | greater compressibility of brain tissue |
| D        | storage coefficient   | $c = 10^{-5} \text{ Pa}^{-1}$ | greater cranial compliance              |

**Table 3.** Overview of the selected models, their deviation from the standard parameterization and the corresponding interpretation

## 110 Model variations

111 The effect of the model's parameterization is of particular interest due to the uncertainty of the chosen parameters.  
112 Additionally, variations of material parameters offer insights into the relation of changing material characteristics  
113 (possibly caused by diseases or ageing) and alterations in the pulsatile motion of the brain. Since an extensive  
114 exploration of the parameter space of the model is out of scope for this work, we restrict our analysis to a collection  
115 of selected deviations from the standard model (Table 3). For model A, we increase the pressure-volume index  
116  $PVI = 10 \text{ ml}$ , which corresponds to a larger spinal compliance. Model B represents stiffer brain parenchyma (Young  
117 Modulus  $E = 3000 \text{ Pa}$ ) while in model C we increase the compressibility of the brain (Poisson ratio  $\nu = 0.4$ ). Finally,  
118 model D features a greater storage coefficient ( $c = 10^{-5} \text{ Pa}^{-1}$ ), which reduces the rise of pressure with additional  
119 fluid volume inside the poroelastic parenchyma and hence models larger intracranial compliance.

## 120 Numerical methods & software

121 The complete system was solved via a fully coupled strategy with a an implicit Euler finite difference discretization  
122 in time and a finite element method in space, following [45]. We approximate the vector-valued unknowns, i.e. the  
123 tissue displacement and fluid velocity, with continuous piecewise quadratic polynomials, while continuous piecewise  
124 linear functions are employed for the pore pressure, total pressure, and fluid pressure. The model is implemented  
125 with the finite element software *FEniCS* [1] and its extension to multiphysics problems *multiphysics* [5]. The  
126 resulting linear system is factorized and solved in every time step with the direct solver *MUMPS* [2, 3], employing a  
127 hybrid approach of distributed and shared memory parallelism (via OpenMP and MPI).

128 We performed convergence tests against smooth manufactured solutions to verify the accuracy of the discretiza-  
129 tion and further verified the computations using mesh and time step convergence tests (Supplementary Figure 9 and  
130 Figure 10).

## 131 Results

132 The cardiac-induced influx of blood to the brain parenchyma induces a complex interplay between the CSF-filled  
133 spaces and poroelastic parenchyma in terms of intracranial pressures and pressure gradients, CSF and ISF flow, and  
134 parenchymal displacements.

### 135 Intracranial pressure

136 At the beginning of the cardiac cycle, the ICP rapidly and nearly uniformly rises from its initial value of 4.5 mmHg  
137 to reach a peak of 8.4 mmHg after approximately 0.3 s (Figure 2). Subsequently, it steadily decreases until the initial  
138 value is reached again and the next cycle begins. The nadir-to-peak pressure variation in time is close to 4.0 mmHg,  
139 whereas the spatial differences are several orders of magnitude smaller. The transmante pressure gradient between  
140 the lateral ventricles and upper convexity of the SAS peaks at 0.18 mmHg/m (Figure 2b). The maximal gradient  
141 between the lateral and the fourth ventricle is almost three times larger, reaching a peak value of 0.41 mmHg/m. The  
142 temporal variations in these pressure gradients oscillate with higher frequency than the cardiac cycle.

143 The spatial ICP distribution differs between the four phases of the cardiac cycle (see Figure 3 sagittal, coronal  
144 and transversal views). In phase I (early systole), we observe the largest spatial pressure variation of the four phases.

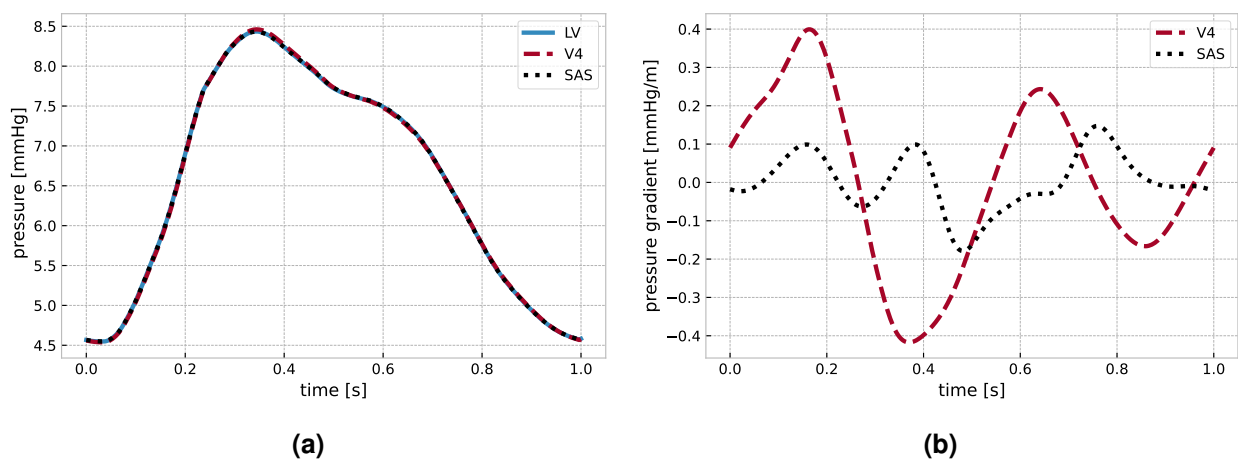

**Figure 2.** (a) Evolution of the ICP inside the lateral ventricles, in the cranial SAS at the upper convexity of the skull, and inside the fourth ventricle. (b) Intracranial pressure gradient from the lateral ventricles to the upper convexity of the cranial SAS (black) and the fourth ventricle (red).

145 While the ICP in the parenchyma, the ventricular system, and the cranial SAS are nearly equal, ICP decreases in  
146 the dorsal direction from the craniocervical junction at the foramen magnum. This results in a pressure drop of 0.21  
147 mmHg from the cranium to the spinal compartment. Additionally, we observe a slightly lower pressure in the fourth  
148 ventricle compared to the third ventricle and surrounding tissue. In phase II (end of net blood inflow), spatial ICP  
149 differences amount to 0.03 mmHg, less than 15% of that of phase I. The peak pressure is now observed at the lowest  
150 point of the cervical spine and in the fourth ventricle. The pressure differences in the ventricular system thus reverse:  
151 highest values occur in the fourth ventricle, decreasing towards the third ventricle and resulting in a small pressure  
152 gradient over the aqueduct. Next, phase III (brain equilibrium) is characterized by small spatial pressure differences  
153 of less than 0.02 mmHg. Inside the ventricular system, the pressure difference over the aqueduct once again reverses,  
154 and the largest pressure is obtained in the third ventricle. Finally, in phase IV (high net blood outflow), the pressure  
155 increases from the craniocervical junction in the caudal direction. The lowest pressure occurs at the frontal part of  
156 the upper convexity of the skull and in the third ventricle. The pressure difference across the aqueduct reverses yet  
157 again.

### 158 CSF flow patterns

159 The differences in pressure distributions induce characteristically different CSF flow patterns across the cardiac  
160 phases (Figure 4). In phase I, CSF rushes out of the cranium into the spinal canal reaching a peak velocity of  
161 78.5 mm/s at the craniocervical junction. Simultaneously, a slower, caudally-directed flow of CSF occurs within  
162 the cranial SAS at velocity magnitudes on the order of 10 mm/s. CSF inside the ventricular system is displaced  
163 downwards through the fourth ventricle and the median aperture. During phase 2, CSF flows from the lateral  
164 ventricles through the foramina of Monro into the third ventricle. Flow in the aqueduct is nearly stagnant, while flow  
165 in the median aperture reverses and is directed into the fourth ventricle. Simultaneously, the caudal CSF flow in the  
166 upper convexity of the cranium and the outflow into the spinal compartment continue on a smaller scale. In phase 3,  
167 almost no flow occurs into the spinal compartment. Inside the ventricular system, we again observe a reversal of flow  
168 directions: CSF moves in the median aperture in the dorsal direction and runs in the opposite direction at the level of  
169 the aqueduct and third ventricle. Finally, in phase 4, we observe the return of CSF from the spinal compartment into  
170 the cranium. CSF flows through the spinal canal, the cranial SAS, and the lower part of the ventricular system and  
171 thereby completes its cycle.

172 In addition to this global description of CSF flow, we consider the flow rates and volumes in the ventricular  
173 system and at the cervical level in more detail (Figure 5). The largest flow rate occurs into the spinal canal, where up  
174 to 6 ml/s leave the cranium into the spinal compartment (Figure 5a). This CSF-spinal flow rate thus corresponds



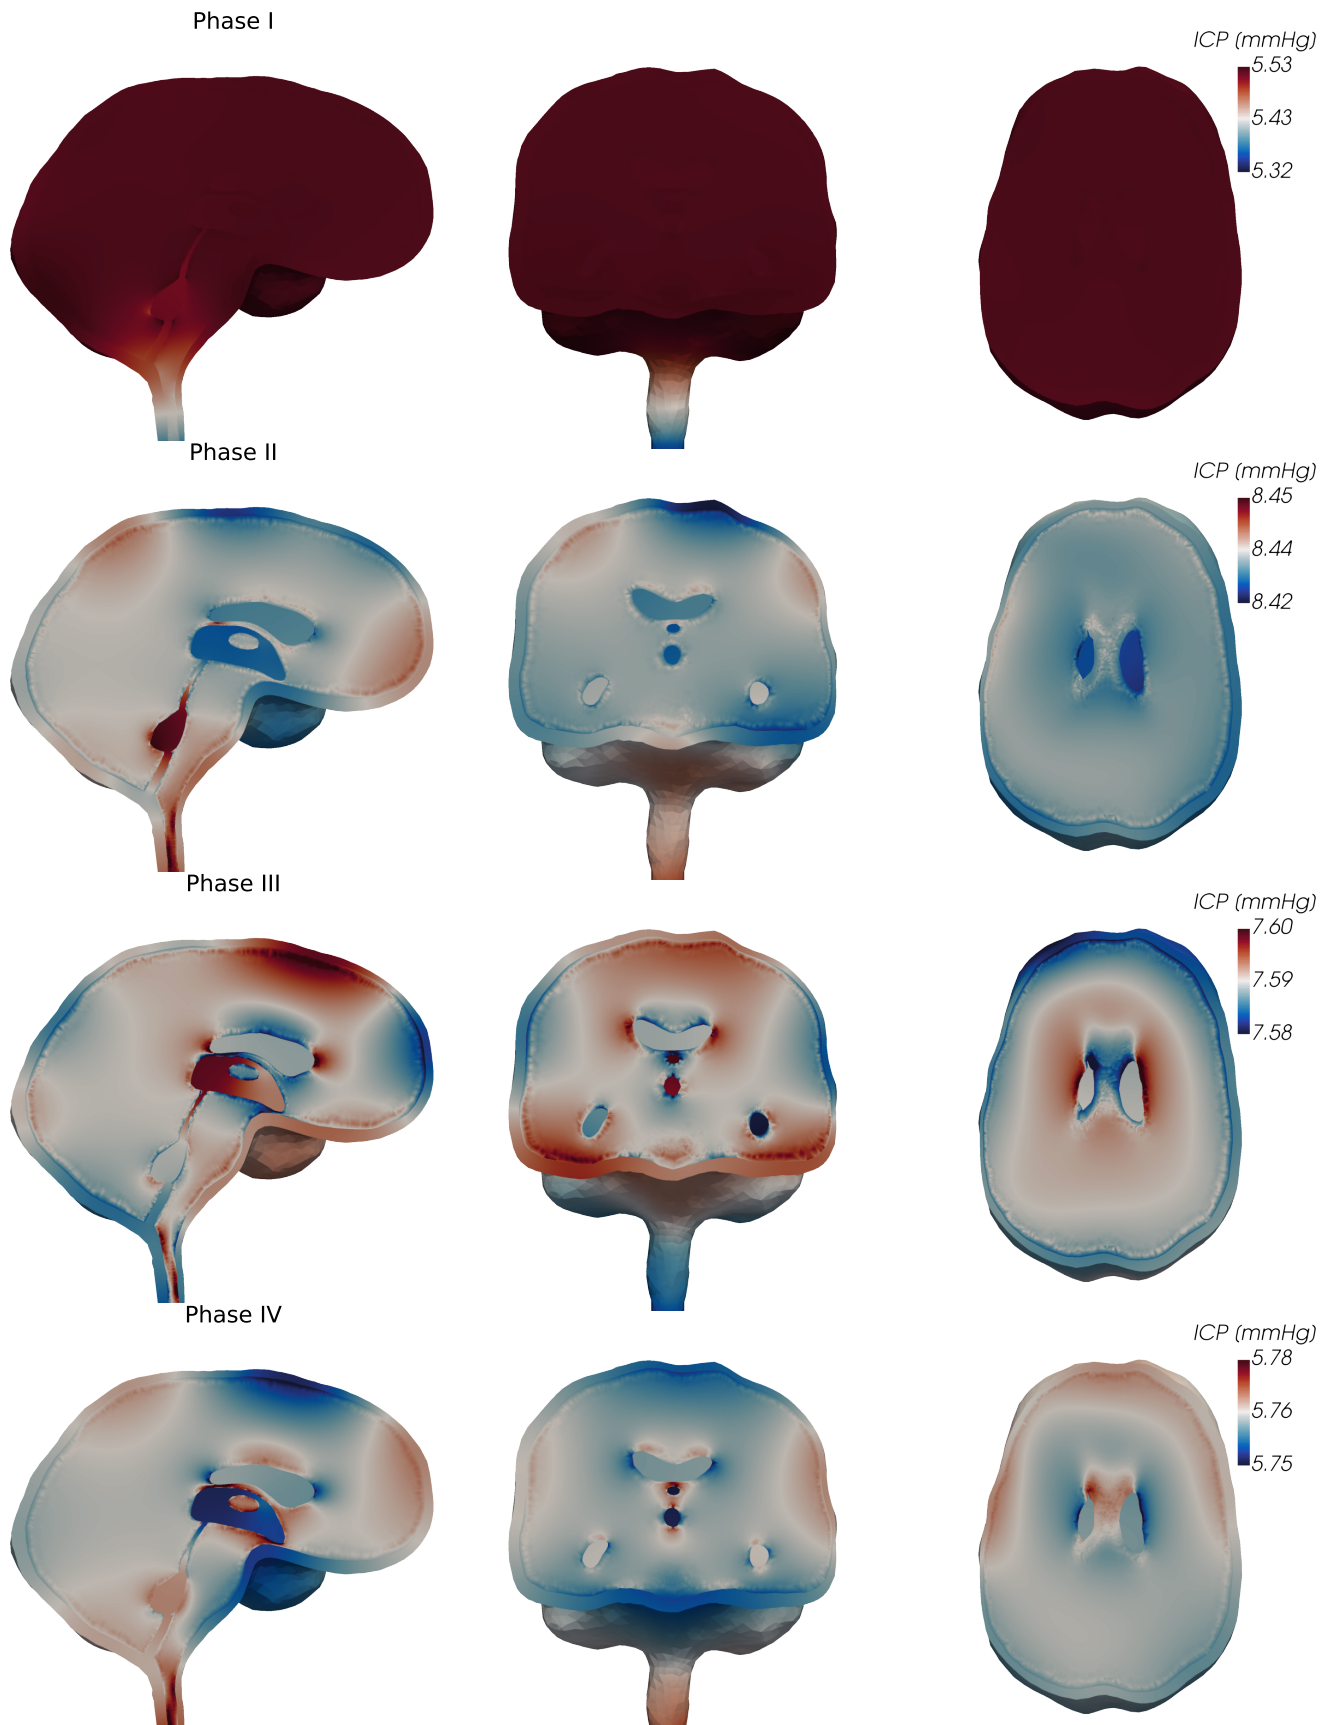

**Figure 3.** Sagittal, coronal, and transversal views of the ICP (fluid pressure in the CSF-filled spaces and total pressure in the parenchyma) during phases I–IV of the cardiac cycle. Note that the color scale changes between the different phases (rows).

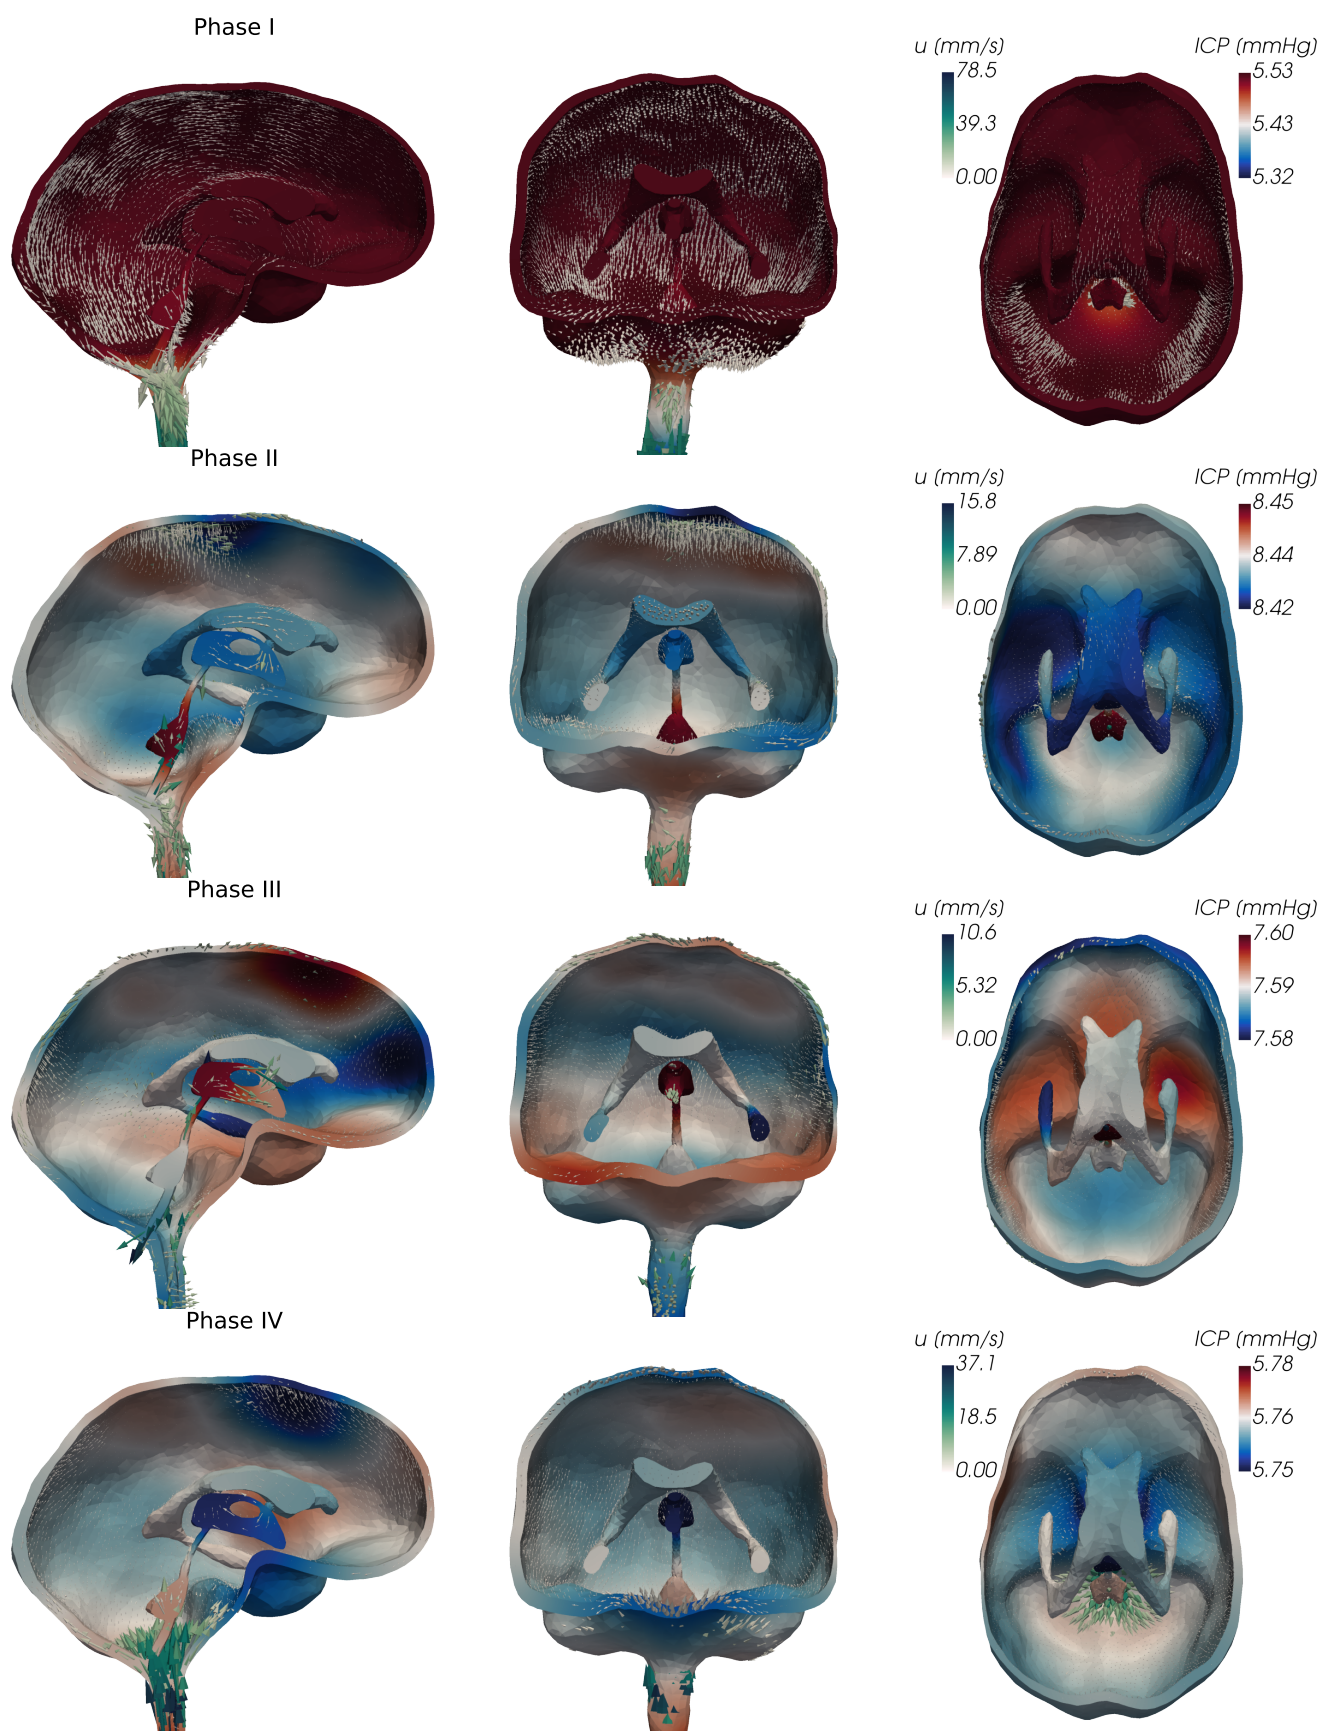

**Figure 4.** Sagittal, coronal, and transverse views of the pressure (ICP) and fluid velocity  $\mathbf{u}$  in the CSF-filled spaces of the cranium during different phases of the cardiac cycle. (Logarithmic scaling of the arrows representing the velocity.)

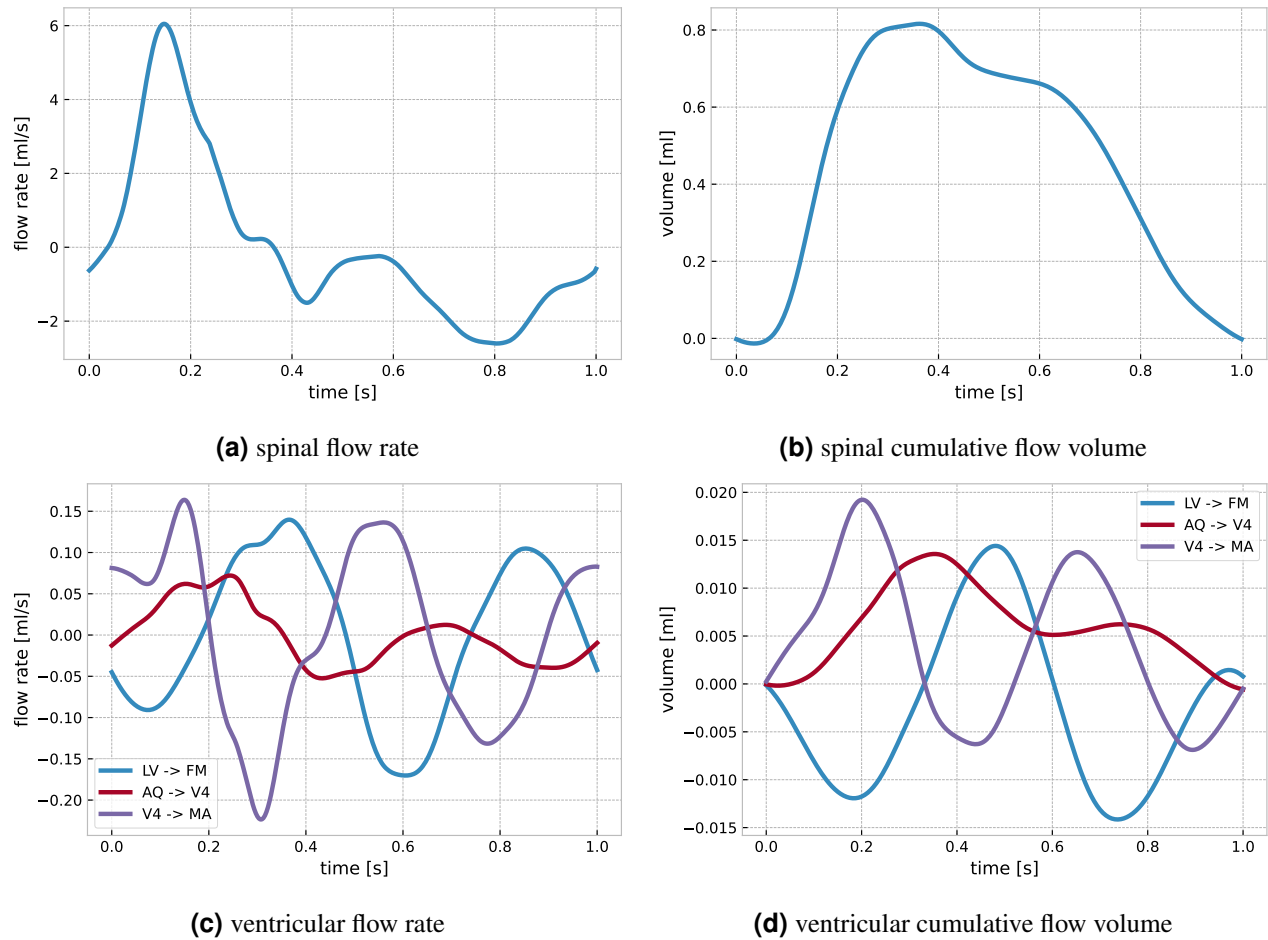

**Figure 5.** Volumetric flow rates and stroke volumes within the ventricular system and into the spinal compartment. LV -> FM denotes flow from the lateral ventricles into the foramina of Monro, AQ -> V4 from the aqueduct into the fourth ventricle, and V4 -> MA from the aqueduct into the median aperture (cf. [Figure 1c](#)).

175 to approximately two-thirds of the amplitude of the net blood inflow. The resulting stroke volume is 0.8 ml and  
176 corresponds to the peak value of the spinal cumulative flow volume at 35% of the cardiac cycle (Figure 5b). The  
177 ventricular flow rates are at least one order of magnitude lower than those of the spinal canal, reaching at most 0.22  
178 ml/s at the transition from the fourth ventricle to the median aperture. In the aqueduct, we observe a peak flow rate  
179 of 0.07 ml/s and a stroke volume of 0.013 ml (Figure 5c, Figure 5d). Notably, within each cardiac cycle, the flow  
180 reverses its direction multiple times. In the lower parts of the ventricular system (median aperture, aqueduct), flow  
181 initially takes place in the dorsal direction and changes its direction three times. At the level of the foramina of  
182 Monro, we observe a short phase of flow into the lateral ventricles at the beginning of the cycle and again three  
183 reversals of direction. Thus, the time of the flow rate peaks in the upper regions of the ventricular system are delayed  
184 compared to the lower regions (Figure 5c)

185 Interstitial flow velocities and volumes within the parenchymal tissue pulsate with the cardiac cycle but are  
186 generally small (peak velocity magnitude less than  $1.9 \mu\text{m/s}$ , and peak spatial average of  $0.13 \text{ nm/s}$ ). The exchange  
187 between ISF and CSF is on the order of nanoliters per second which is negligible compared to flow rates in the  
188 spinal canal (on the order of ml/s).

### 189 **Brain parenchyma displacements**

190 During early systole (phase I), a large dorsal deformation occurs, especially of the infratentorial part of the  
191 brain (Figure 6). A peak displacement magnitude of 0.22 mm is found in the brain stem 12 % into the cardiac  
192 cycle. After 35% of the cycle (in phase II), most of the infratentorial brain regions have return to their original  
193 configuration. In this phase, the displacement predominately occurs at the anterior and posterior ends, and we  
194 observe a rotational movement of the brain around its center. While the posterior regions are deformed downwards,  
195 the frontal region moves up and backwards. In the third phase, the overall pattern changes only slightly. Specifically,  
196 the anterior displacement decreases and the center of rotation moves forward. In the final phase of the cardiac  
197 cycle, the displacement magnitude decreases substantially and the remaining displacement is predominantly in the  
198 frontal superior parts in an upwards direction and in the central inferior region of the brain in the caudal direction.  
199 Throughout the cycle, we note some radial displacements of the spinal cord.

### 200 **Role of brain and spinal cord compliances**

201 The set of quantities of interest predicted by the different computational models (models A–D) differ from the  
202 standard model (Figure 7). For all quantities of interest, the outputs of the models range between 19 % and 166 %  
203 relative to the standard model.

204 **Increased spinal compliance** Increasing the spinal compliance by increasing the spinal pressure-volume index  
205 (Model A), yields increased aqueduct stroke volumes, spinal stroke volumes and peak aqueduct flow rates (by 53%,  
206 54%, 39% respectively) relative to the standard model. In addition, the peak displacement is increased by 66%,  
207 and the peak transmantle pressure gradient increases by 61%. Conversely, the total pressure variation in the lateral  
208 ventricles is substantially reduced, by 63%. In addition, the ICP curve changes characteristics (Supplementary  
209 Figure 11). With increased spinal compliance, additional peaks (P1, P2, P3) are seen in the ICP signal.

210 **Increased brain stiffness** Increasing the brain stiffness (Model B) reduces the peak brain displacement by 44% .  
211 The other clinical quantities of interest remain unchanged.

212 **Increased brain compressibility** Increasing the brain compressibility (Model C) yields only negligible changes  
213 in clinical quantities of interest. The largest difference relative to the standard model is observed for the peak  
214 transmantle pressure gradient, and only amounts to a 6% decrease.

215 **Increased storage coefficient** Decreasing the brain parenchyma's poroelastic storage coefficient (Model D)  
216 results in substantial decreases in the set of clinical quantities of interest computed. The aqueduct stroke volume,  
217 spinal stroke volume and peak aqueduct flow rates are reduced by by 75%, 76%, and 78%, respectively. The peak  
218 displacement is decreased by 68%, and the peak transmantle pressure gradient by 64%. Similarly, the total pressure  
219 variation in the lateral ventricles is reduced by 81%.



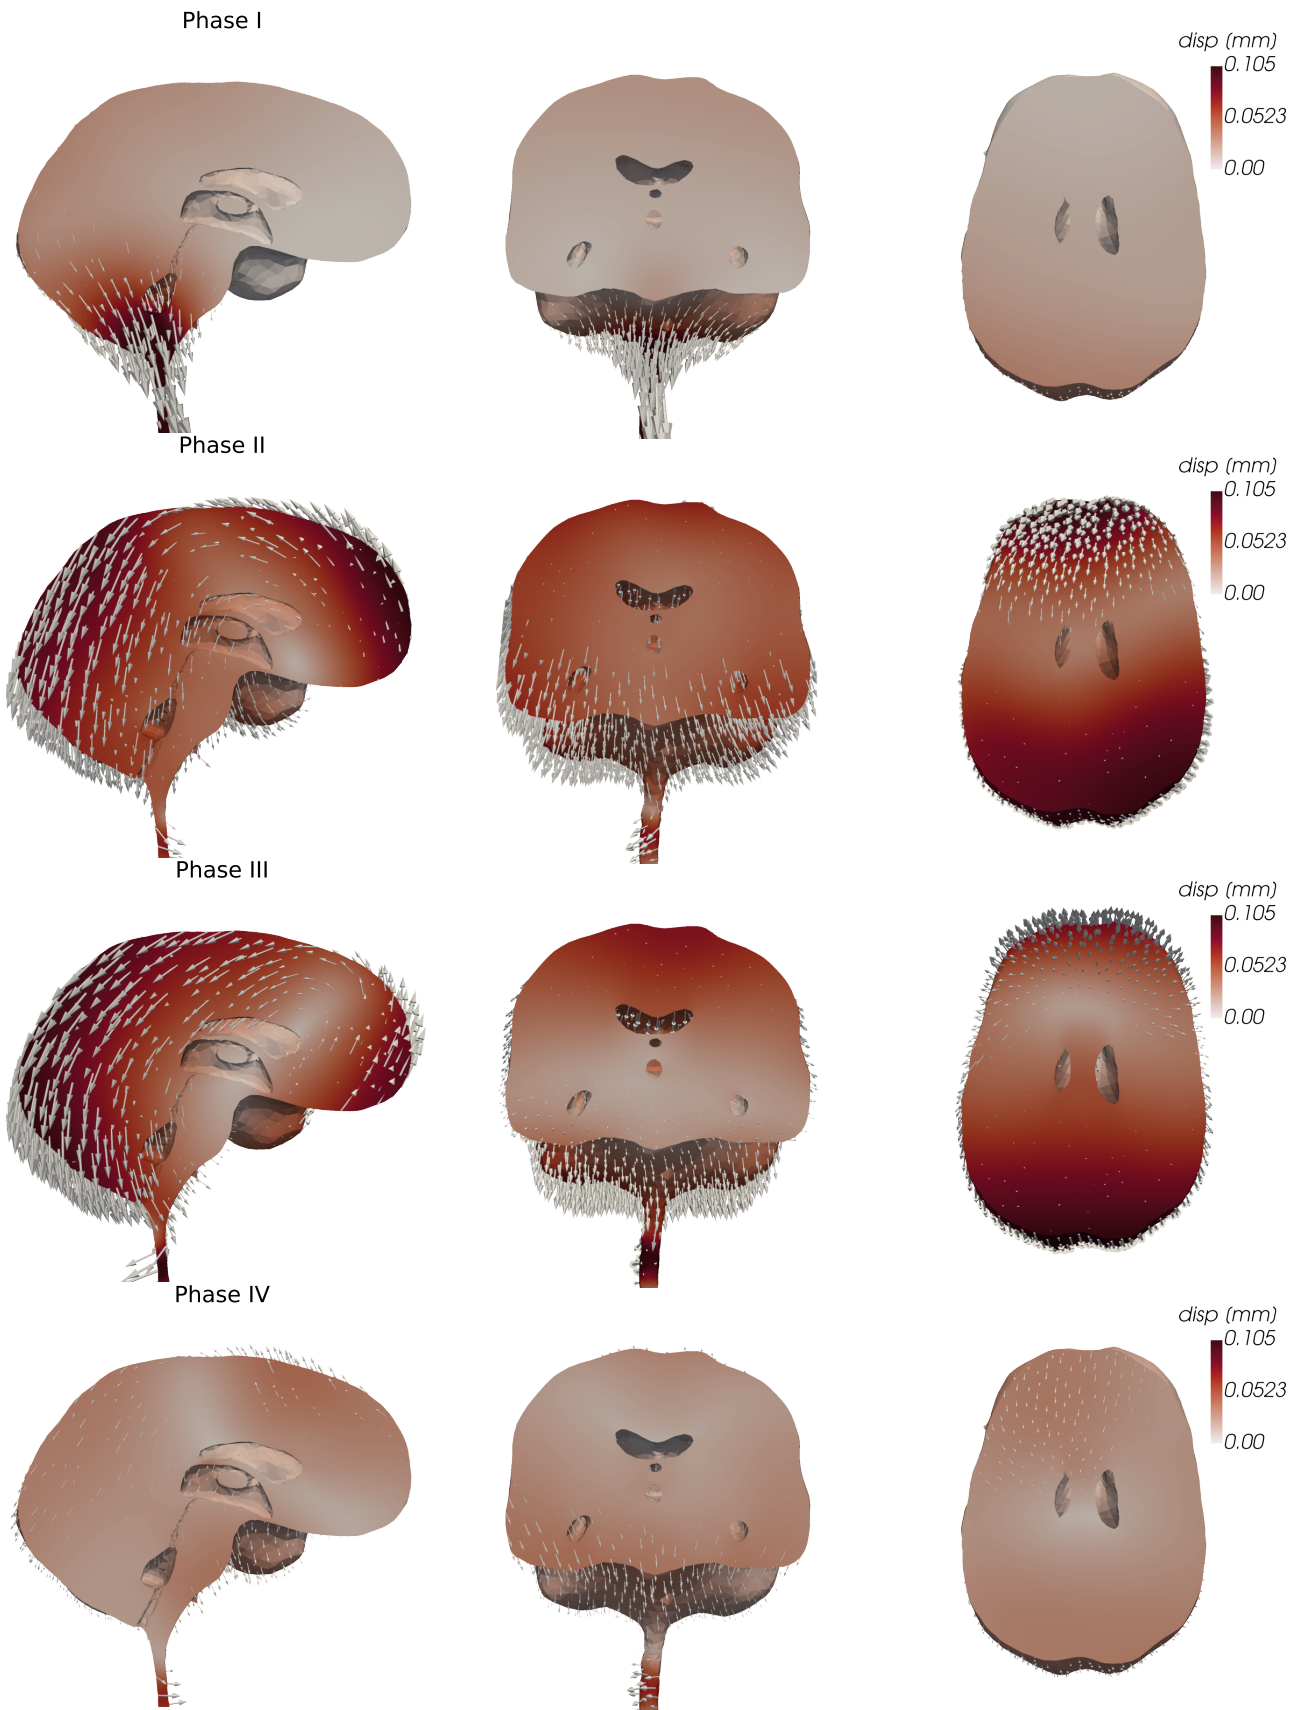

**Figure 6.** Sagittal, coronal, and transverse views of the brain parenchymal displacement during different phases of the cardiac cycle. The glyph arrows representing the displacement are amplified by a factor of 200.

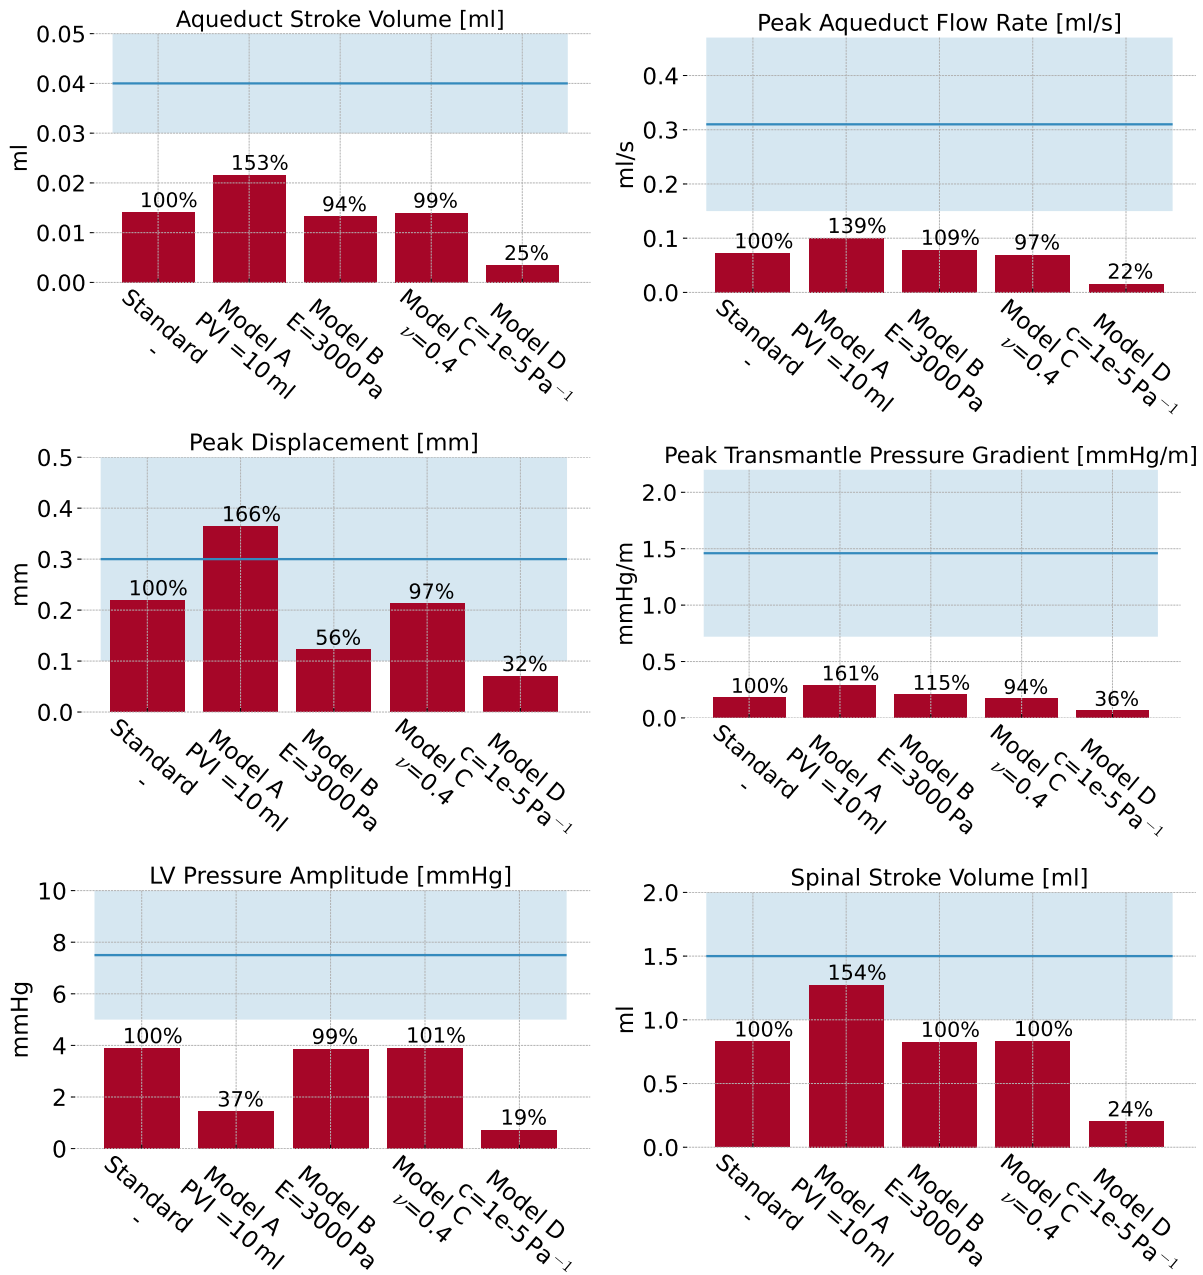

**Figure 7.** Overview of clinical quantities of interest of a set of model variations from the standard parameterization. The blue horizontal bar represents the range of physiologically realistic values with the blue line indicating the mean value.

## 220 Discussion

221 We have presented a three-dimensional computational model of fully coupled cardiac-induced pulsatile CSF flow and  
222 tissue motion in the human brain environment. Variations in the ICP were dominated by their temporal amplitude, but  
223 with small spatial variations in both the CSF-filled spaces and the parenchyma. The ICP variations induce substantial  
224 ventricular and cranial-spinal CSF flow, some flow in the cranial SAS, and small pulsatile ISF velocities in the brain  
225 parenchyma. Investigating the displacement of parenchymal tissue, we found a funnel-shaped deformation in dorsal  
226 direction at the beginning of the cardiac cycle, followed by a rotational motion around an axis normal to the brain's  
227 sagittal plane. Moderate variations in the brain and spinal cord compliances altered model outputs.

228 The temporal pressure variations are in good agreement with previous clinical reports. Wagshul, Eide, and  
229 Madsen [60] reported typical nadir-to-peak ICP amplitudes of 5 to 10 mmHg for healthy subjects, which is only  
230 slightly higher than the 4 mmHg obtained here. Considering the morphology of the ICP waveform, notable  
231 differences between individuals seem to exist: while the general cardiac cycle pattern of increasing and decreasing  
232 pressure persists across subjects, many clinical studies have reported several peaks in the ICP signal (P1, P2, P3)  
233 [60, 56]. Unnerbäck, Ottesen, and Reinstrup [56] suggested that the first peak (P1) is caused by the rapid rise of  
234 blood inflow, while the following peaks may be related to subsequent resonance phenomena. Carrera et al. [12]  
235 related P1 to peak arterial inflow, while P2 and P3 were related to peak values in cerebral arterial blood volume. In  
236 our (standard) computational model, the peak in ICP signal is related to the change of sign in the net blood flow  
237 curve. However, additional peaks (P1, P2, P3) occur when the spinal compliance is increased. We note that our  
238 computed ICP curve lies well within the range of clinically reported curves by Ziólkowski et al. [62] and closely  
239 resembles the in-vitro modelling results by Benninghaus et al. [8]. A transmantle pressure gradient is hypothesized  
240 to drive the development of hydrocephalus [50, 19], though with recent findings also pointing at genetic factors [17].  
241 Stephensen, Tisell, and Wikkelsö [50] reported no static transmantle pressure gradient, which agrees with the small  
242 pulsatile pressure gradients (peaking at 0.06 – 0.30 mmHg/m) predicted here. Taking the pulsatile nature of the ICP  
243 into account, Eide [19] measured higher amplitudes in the lateral ventricles compared to the parenchymal tissue  
244 close to the skull. Similarly, Vinje et al. [59] found pulsatile ICP gradients with average amplitudes of  $1.46 \pm 0.74$   
245 mmHg/m, which is roughly one order of magnitude higher than the pulsatile transmantle gradient obtained in this  
246 work. Complementary to these clinical findings in (suspected) hydrocephalic patients, Linninger et al. [34] used  
247 computational fluid dynamics to compute maximal transmantle pressure differences of 10 Pa in healthy, and 30 Pa  
248 in hydrocephalus patients. In a subsequent modeling paper Sweetman et al. [51] predicted a maximal transmantle  
249 pressure difference in healthy individuals of 4 Pa. Assuming a distance of 6 cm between the lateral ventricles and  
250 the SAS, these pressure differences correspond to pressure gradients of approximately 0.5 – –1.25 mmHg/m for  
251 healthy individuals and 3.75 mmHg/m for hydrocephalus patients. The computed transmantle pressure gradient is  
252 likely influenced by a number of model choices including the geometry representation, material parameters and  
253 importantly the assumed homogeneous net blood flow.

254 Consistent with the comparatively small spatial pressure differences computed, we find flow rates and stroke  
255 volumes in the ventricular system at the lower range of previous reports. The peak aqueductal flow rate and the  
256 spinal stroke volume of our standard model reach 70% and 80%, respectively, of the values reported by Wagshul,  
257 Eide, and Madsen [60]. However, with a higher spinal compliance, the computed spinal stroke volume (1.25 ml)  
258 is within the clinical range. This finding represents a different distribution of compliance in the overall system: a  
259 higher spinal compliance allows more CSF to leave the cranium into the spinal compartment. Furthermore, our  
260 computed aqueduct stroke volume (13  $\mu$ l) is lower than measured values of 30 to 50  $\mu$ l [60]. Balédent [4] suggested  
261 that the contribution of the ventricular system to the regulation of ICP is low compared to the effect of cervical CSF  
262 outflow. This conforms with our results since the aqueductal flow peaks later than the cervical outflow and reaches  
263 only 16% of its volume. The phase shift of ventricular CSF oscillations observed in the numerical results is in good  
264 agreement with clinical data. Balédent [4] found a significant phase shift between aqueductal and cervical CSF flow  
265 and Wagshul, Eide, and Madsen [60] reported a delay of 15% of the cardiac cycle in the cerebral aqueduct, which  
266 matches the 12% delay between peak aqueductal flow and peak blood inflow in our results. Note that we emphasize  
267 a comparison between computational and clinical flow rates and volumes rather than CSF velocities as velocities are

268 highly sensitive to geometrical features.

269 Balédent [4] observed the reversal of cervical CSF flow at the brain equilibrium phase at approximately 55 % of  
270 the cardiac cycle. In contrast, in our numerical results, the flow reverses after 38 % of the cycle, which corresponds  
271 to the begin of net blood outflow of the cranium. Additionally, their outflow curves take a smooth single-peaked  
272 shape over the cardiac cycle, while our results indicate a close resemblance of the flow rate curve and the blood  
273 inflow curve. This discrepancy may be explained by a lack of sufficient compliance in the modeled cranial system,  
274 which leads to a direct transfer of blood inflow to cervical CSF outflow morphology. Similarly, the multiple reversals  
275 of ventricular flow in our model do not match the clinically observed, almost sinusoidal waveforms [4]. These  
276 flow reversals are also expected to reduce the corresponding stroke volume. This behaviour might be explained by  
277 deviating elastic properties of the brain tissue, leading to multiple oscillations of pressure and flow after the initial  
278 excitation of the system at peak blood inflow.

279 Our model predicts peak ISF velocity magnitudes in agreement with reported values for interstitial bulk flow  
280 on the order of micrometers per second [38]. However, the ISF flow computed is pulsatile in time (representing  
281 back-and-forth motion over the cardiac cycle rather than bulk flow), and its spatial average is more than two orders  
282 of magnitude smaller than its peak value.

283 The magnitude and direction of the displacement are in good agreement with clinical findings. Based on MRI  
284 techniques, Enzmann and Pelc [21], Greitz et al. [24] and Poncelet et al. [42] reported the peak displacement of  
285 brain tissue to range from 0.1 to 0.5 mm. More recently, Pahlavian et al. [40] found a peak mean displacement  
286 of the brain's substructures of up to  $0.187 \pm 0.05$  mm and Sloots, Biessels, and Zwanenburg [48] reported peak  
287 displacements of around 0.2 mm; both fit well with the maximal value of 0.22 mm observed in our study. Both these  
288 studies [40, 48] reported largest displacements at the brain stem, aligning well with observations from our model.  
289 Greitz et al. [24] found a funnel-shaped movement in the dorsal direction and hypothesized that the relatively low  
290 pressure below the foramen magnum during early systole induces this motion, which aligns with our numerical  
291 results.

292 Although the model of intracranial pulsatility developed in this work is highly detailed in terms of geometry and  
293 biophysical mechanisms, several limitations remain. First, the complex interplay of arterial blood inflow, intracranial  
294 dynamics, and venous outflow is simplified into a spatially uniform fluid source in the parenchymal tissue. While  
295 the equivalence of the effect of additional fluid volume justifies this approximation, it may still be necessary to  
296 include heterogeneities in the source term and differentiate between fluid networks to account for differences in  
297 blood perfusion in different regions. Furthermore, even though the time series of net blood flow used in this study  
298 (from Balédent [4]) is representative for healthy adults, individual differences in shape and amplitude of the cerebral  
299 blood inflow might have a substantial influence on flow and pressure patterns. We also neglect CSF production  
300 effects, here without loss of relevance, as any net flow of CSF from its sites of production to absorption is two orders  
301 of magnitude smaller than the cardiac induced pulsatile motion [59].

302 Additional limitations include the uncertainty associated with material parameters, and the assumption of spatial  
303 homogeneity in brain tissue, as white and gray matter and subregions likely possess different elastic properties [11].  
304 We expect the effect of moderate heterogeneity on the computational quantities of interest to be relatively small  
305 in light of our results with increased elastic stiffness (model B). Furthermore, the boundary conditions describing  
306 the transition to the spinal compartment are based on simplifying assumptions. Incorporating a flow resistance  
307 to the spinal outflow boundary condition and relaxing the no-displacement assumption of the spinal cord are  
308 likely to affect the computational predictions, especially in the brain stem and spinal compartment, and also the  
309 pulsatile flow patterns in the aqueduct. Despite the high degree of spatial detail of our model, some features of the  
310 intracranial anatomy remain unresolved. As an example, we hypothesize that the tentorium cerebelli would stabilize  
311 the brain tissue and block CSF flow, potentially leading to higher pressure differences between the infratentorial and  
312 supratentorial regions of the brain.



## 313 Conclusion

314 In summary, we have presented a new computational model of intracranial fluid flow and tissue motion during the  
315 cardiac cycle that offers high resolution and detail in both space and time, and is well-aligned with clinical obser-  
316 vations. The model offers a qualitative and quantitative platform for detailed investigation of coupled intracranial  
317 dynamics and interplay, both under physiological and pathophysiological conditions.

## 318 References

- 319 [1] Martin Alnæs et al. “The FEniCS Project Version 1.5”. In: *Archive of Numerical Software* 3.100 (100 Dec. 7,  
320 2015). ISSN: 2197-8263. DOI: [10.11588/ans.2015.100.20553](https://doi.org/10.11588/ans.2015.100.20553). URL: <https://journals.uni-heidelberg.de/index.php/ans/article/view/20553> (visited on 11/25/2020).
- 321
- 322 [2] P.R. Amestoy et al. “A Fully Asynchronous Multifrontal Solver Using Distributed Dynamic Scheduling”. In:  
323 *SIAM Journal on Matrix Analysis and Applications* 23.1 (2001), pp. 15–41.
- 324 [3] P.R. Amestoy et al. “Performance and Scalability of the Block Low-Rank Multifrontal Factorization on  
325 Multicore Architectures”. In: *ACM Transactions on Mathematical Software* 45.1 (2019), 2:1–2:26.
- 326 [4] Olivier Balédent. “Imaging of the Cerebrospinal Fluid Circulation”. In: *Adult Hydrocephalus*. Ed. by Daniele  
327 Rigamonti. Cambridge: Cambridge University Press, 2014, pp. 121–138. ISBN: 978-1-139-38281-6. DOI:  
328 [10.1017/CBO9781139382816.013](https://doi.org/10.1017/CBO9781139382816.013). URL: [https://www.cambridge.org/core/product/](https://www.cambridge.org/core/product/identifier/9781139382816%23c03177-12-1/type/book_part)  
329 [identifier/9781139382816%23c03177-12-1/type/book\\_part](https://www.cambridge.org/core/product/identifier/9781139382816%23c03177-12-1/type/book_part) (visited on 05/15/2020).
- 330 [5] Francesco Ballerin. *Multiphenics | mathLab Innovating with Mathematics*. 2020. URL: [https://mathlab.](https://mathlab.sissa.it/multiphenics)  
331 [sissa.it/multiphenics](https://mathlab.sissa.it/multiphenics) (visited on 11/25/2020).
- 332 [6] Ted W. Barber, Judith A. Brockway, and Lawrence S. Higgins. “THE DENSITY OF TISSUES IN AND  
333 ABOUT THE HEAD”. In: *Acta Neurologica Scandinavica* 46.1 (Mar. 1970), pp. 85–92. ISSN: 00016314,  
334 16000404. DOI: [10.1111/j.1600-0404.1970.tb05606.x](https://doi.org/10.1111/j.1600-0404.1970.tb05606.x). URL: [http://doi.wiley.com/](http://doi.wiley.com/10.1111/j.1600-0404.1970.tb05606.x)  
335 [10.1111/j.1600-0404.1970.tb05606.x](http://doi.wiley.com/10.1111/j.1600-0404.1970.tb05606.x) (visited on 11/16/2020).
- 336 [7] Gordon S. Beavers and Daniel D. Joseph. “Boundary Conditions at a Naturally Permeable Wall”. In: *Journal*  
337 *of Fluid Mechanics* 30.1 (Oct. 17, 1967), pp. 197–207. ISSN: 0022-1120, 1469-7645. DOI: [10.1017/](https://doi.org/10.1017/S0022112067001375)  
338 [S0022112067001375](https://doi.org/10.1017/S0022112067001375). URL: [https://www.cambridge.org/core/product/identifier/](https://www.cambridge.org/core/product/identifier/S0022112067001375/type/journal_article)  
339 [S0022112067001375/type/journal\\_article](https://www.cambridge.org/core/product/identifier/S0022112067001375/type/journal_article) (visited on 11/26/2020).
- 340 [8] Anne Benninghaus et al. “Enhanced in vitro model of the CSF dynamics”. In: *Fluids and Barriers of the CNS*  
341 16.1 (2019), pp. 1–11.
- 342 [9] Maurice A. Biot. “General Theory of Three-Dimensional Consolidation”. In: *Journal of applied physics* 12.2  
343 (1941).
- 344 [10] I.G. Bloomfield, I.H. Johnston, and L.E. Bilston. “Effects of Proteins, Blood Cells and Glucose on the Viscosity  
345 of Cerebrospinal Fluid”. In: *Pediatric Neurosurgery* 28.5 (1998), pp. 246–251. ISSN: 1016-2291, 1423-0305.  
346 DOI: [10.1159/000028659](https://doi.org/10.1159/000028659). URL: <https://www.karger.com/Article/FullText/28659>  
347 (visited on 11/16/2020).
- 348 [11] Silvia Budday et al. “Mechanical Properties of Gray and White Matter Brain Tissue by Indentation”. In:  
349 *Journal of the Mechanical Behavior of Biomedical Materials* 46 (June 2015), pp. 318–330. ISSN: 17516161.  
350 DOI: [10.1016/j.jmbbm.2015.02.024](https://doi.org/10.1016/j.jmbbm.2015.02.024). URL: [https://linkinghub.elsevier.com/](https://linkinghub.elsevier.com/retrieve/pii/S1751616115000673)  
351 [retrieve/pii/S1751616115000673](https://linkinghub.elsevier.com/retrieve/pii/S1751616115000673) (visited on 11/17/2020).
- 352 [12] Emmanuel Carrera et al. “What shapes pulse amplitude of intracranial pressure?” In: *Journal of neurotrauma*  
353 27.2 (2010), pp. 317–324.
- 354 [13] Marius Causemann, Vegard Vinje, and Marie E. Rognes. *Human intracranial pulsatility during the cardiac*  
355 *cycle: a computational modelling framework*. May 2022. DOI: [10.5281/zenodo.6553790](https://doi.org/10.5281/zenodo.6553790). URL:  
356 <https://doi.org/10.5281/zenodo.6553790>.

- 357 [14] J Levi Chazen et al. “Automated segmentation of MR imaging to determine normative central nervous system  
358 cerebrospinal fluid volumes in healthy volunteers”. In: *Clinical imaging* 43 (2017), pp. 132–135.
- 359 [15] Dean Chou et al. “A Fully Dynamic Multi-Compartmental Poroelastic System: Application to Aqueductal  
360 Stenosis”. In: *Journal of Biomechanics*. Selected Articles from the International Conference on CFD in  
361 Medicine and Biology (Albufeira, Portugal – August 30th - September 4th, 2015) 49.11 (July 26, 2016),  
362 pp. 2306–2312. ISSN: 0021-9290. DOI: [10.1016/j.jbiomech.2015.11.025](https://doi.org/10.1016/j.jbiomech.2015.11.025). URL: <http://www.sciencedirect.com/science/article/pii/S0021929015006673> (visited on 05/13/2020).
- 363  
364 [16] Kelly P. Cosgrove, Carolyn M. Mazure, and Julie K. Staley. “Evolving Knowledge of Sex Differences in Brain  
365 Structure, Function, and Chemistry”. In: *Biological Psychiatry* 62.8 (Oct. 2007), pp. 847–855. ISSN: 00063223.  
366 DOI: [10.1016/j.biopsych.2007.03.001](https://doi.org/10.1016/j.biopsych.2007.03.001). URL: <https://linkinghub.elsevier.com/retrieve/pii/S0006322307001989> (visited on 11/12/2020).
- 367  
368 [17] Duy. “Impaired neurogenesis alters brain biomechanics in a neuroprogenitor-based genetic subtype of  
369 congenital hydrocephalus”. In: *Nature X* (2022).
- 370 [18] M Ehrhardt. “An Introduction to Fluid-Porous Interface Coupling”. In: *Progress in computational physics*  
371 (2010), p. 10.
- 372 [19] Per K. Eide. “Demonstration of Uneven Distribution of Intracranial Pulsatility in Hydrocephalus Patients”. In:  
373 *Journal of Neurosurgery* 109.5 (Nov. 2008), pp. 912–917. ISSN: 0022-3085, 1933-0693. DOI: [10.3171/JNS/2008/109/11/0912](https://doi.org/10.3171/JNS/2008/109/11/0912). URL: <https://thejns.org/view/journals/j-neurosurg/109/5/article-p912.xml> (visited on 04/21/2020).
- 374  
375  
376 [20] Per Kristian Eide and Terje Sæhle. “Is Ventriculomegaly in Idiopathic Normal Pressure Hydrocephalus  
377 Associated with a Transmantle Gradient in Pulsatile Intracranial Pressure?” In: *Acta Neurochirurgica* 152.6  
378 (June 2010), pp. 989–995. ISSN: 0001-6268, 0942-0940. DOI: [10.1007/s00701-010-0605-x](https://doi.org/10.1007/s00701-010-0605-x). URL:  
379 <http://link.springer.com/10.1007/s00701-010-0605-x> (visited on 04/17/2020).
- 380 [21] D R Enzmann and N J Pelc. “Brain Motion: Measurement with Phase-Contrast MR Imaging.” In: *Radiology*  
381 185.3 (Dec. 1992), pp. 653–660. ISSN: 0033-8419, 1527-1315. DOI: [10.1148/radiology.185.3.1438741](https://doi.org/10.1148/radiology.185.3.1438741). URL: <http://pubs.rsna.org/doi/10.1148/radiology.185.3.1438741>  
382 (visited on 11/12/2020).
- 383  
384 [22] Andriy Fedorov et al. “3D Slicer as an Image Computing Platform for the Quantitative Imaging Network”. In:  
385 *Magnetic Resonance Imaging* 30.9 (Nov. 2012), pp. 1323–1341. ISSN: 1873-5894. DOI: [10.1016/j.mri.2012.05.001](https://doi.org/10.1016/j.mri.2012.05.001). pmid: 22770690.
- 386  
387 [23] Seifollah Gholampour. “FSI Simulation of CSF Hydrodynamic Changes in a Large Population of Non-  
388 Communicating Hydrocephalus Patients during Treatment Process with Regard to Their Clinical Symptoms”.  
389 In: *PLOS ONE* 13.4 (Apr. 30, 2018), e0196216. ISSN: 1932-6203. DOI: [10.1371/journal.pone.0196216](https://doi.org/10.1371/journal.pone.0196216). URL: <https://journals.plos.org/plosone/article?id=10.1371/journal.pone.0196216> (visited on 08/27/2020).
- 390  
391  
392 [24] D. Greitz et al. “Pulsatile Brain Movement and Associated Hydrodynamics Studied by Magnetic Resonance  
393 Phase Imaging: The Monro-Kellie Doctrine Revisited”. In: *Neuroradiology* 34.5 (1992), pp. 370–380. ISSN:  
394 0028-3940, 1432-1920. DOI: [10.1007/BF00596493](https://doi.org/10.1007/BF00596493). URL: <http://link.springer.com/10.1007/BF00596493> (visited on 12/01/2020).
- 395  
396 [25] Liwei Guo et al. “On the Validation of a Multiple-Network Poroelastic Model Using Arterial Spin Labeling  
397 MRI Data”. In: *Frontiers in Computational Neuroscience* 13 (2019). ISSN: 1662-5188. DOI: [10.3389/fncom.2019.00060](https://doi.org/10.3389/fncom.2019.00060). URL: <https://www.frontiersin.org/articles/10.3389/fncom.2019.00060/full> (visited on 03/31/2020).
- 398  
399

- 400 [26] Liwei Guo et al. “Subject-Specific Multi-Poroelastic Model for Exploring the Risk Factors Associated with the  
401 Early Stages of Alzheimer’s Disease”. In: *Interface Focus* 8.1 (Feb. 6, 2018), p. 20170019. ISSN: 2042-8898,  
402 2042-8901. DOI: [10.1098/rsfs.2017.0019](https://doi.org/10.1098/rsfs.2017.0019). URL: <https://royalsocietypublishing.org/doi/10.1098/rsfs.2017.0019> (visited on 11/13/2020).
- 404 [27] D.E. Haines and G.A. Mihailoff. “An Overview of the Brainstem”. In: *Fundamental Neuroscience for Basic  
405 and Clinical Applications*. Elsevier, 2018, pp. 152–159. ISBN: 978-0-323-39632-5. DOI: [10.1016/B978-  
406 0-323-39632-5.00010-4](https://doi.org/10.1016/B978-0-323-39632-5.00010-4). URL: [https://linkinghub.elsevier.com/retrieve/pii/  
407 B9780323396325000104](https://linkinghub.elsevier.com/retrieve/pii/B9780323396325000104) (visited on 11/16/2020).
- 408 [28] Karl Erik Holter et al. “Interstitial Solute Transport in 3D Reconstructed Neuropil Occurs by Diffusion  
409 Rather than Bulk Flow”. In: *Proceedings of the National Academy of Sciences* 114.37 (Sept. 12, 2017),  
410 pp. 9894–9899. ISSN: 0027-8424, 1091-6490. DOI: [10.1073/pnas.1706942114](https://doi.org/10.1073/pnas.1706942114). URL: [http://www.  
411 pnas.org/lookup/doi/10.1073/pnas.1706942114](http://www.pnas.org/lookup/doi/10.1073/pnas.1706942114) (visited on 04/24/2020).
- 412 [29] L. Howden et al. “Three-Dimensional Cerebrospinal Fluid Flow within the Human Ventricular System”.  
413 In: *Computer Methods in Biomechanics and Biomedical Engineering* 11.2 (Apr. 2008), pp. 123–133. ISSN:  
414 1025-5842, 1476-8259. DOI: [10.1080/10255840701492118](https://doi.org/10.1080/10255840701492118). URL: [http://www.tandfonline.  
415 com/doi/abs/10.1080/10255840701492118](http://www.tandfonline.com/doi/abs/10.1080/10255840701492118) (visited on 08/19/2020).
- 416 [30] Ferenc A. Jolesz, ed. *Intraoperative Imaging and Image-Guided Therapy*. New York: Springer, 2014. 893 pp.  
417 ISBN: 978-1-4614-7656-6.
- 418 [31] J. J. Lee et al. “A Mixed Finite Element Method for Nearly Incompressible Multiple-Network Poroelasticity”.  
419 In: *SIAM Journal on Scientific Computing* 41.2 (Jan. 2019), A722–A747. ISSN: 1064-8275, 1095-7197.  
420 DOI: [10.1137/18M1182395](https://doi.org/10.1137/18M1182395). URL: [https://epubs.siam.org/doi/10.1137/18M1182395  
421](https://epubs.siam.org/doi/10.1137/18M1182395) (visited on 03/30/2020).
- 422 [32] Erika Kristina Lindstrøm et al. “Cerebrospinal fluid volumetric net flow rate and direction in idiopathic normal  
423 pressure hydrocephalus”. In: *NeuroImage: Clinical* 20 (2018), pp. 731–741.
- 424 [33] A.A. Linninger et al. “Pulsatile Cerebrospinal Fluid Dynamics in the Human Brain”. In: *IEEE Transactions  
425 on Biomedical Engineering* 52.4 (Apr. 2005), pp. 557–565. ISSN: 0018-9294. DOI: [10.1109/TBME.2005.  
426 844021](https://doi.org/10.1109/TBME.2005.844021). URL: <http://ieeexplore.ieee.org/document/1408112/> (visited on 06/01/2020).
- 427 [34] Andreas A. Linninger et al. “Cerebrospinal Fluid Flow in the Normal and Hydrocephalic Human Brain”. In:  
428 *IEEE Transactions on Biomedical Engineering* 54.2 (Feb. 2007), pp. 291–302. ISSN: 0018-9294. DOI: [10.  
429 1109/TBME.2006.886853](https://doi.org/10.1109/TBME.2006.886853). URL: [http://ieeexplore.ieee.org/document/4067116/  
430](http://ieeexplore.ieee.org/document/4067116/) (visited on 06/02/2020).
- 431 [35] Andreas A. Linninger et al. “Cerebrospinal Fluid Mechanics and Its Coupling to Cerebrovascular Dynamics”.  
432 In: *Annual Review of Fluid Mechanics* 48.1 (Jan. 3, 2016), pp. 219–257. ISSN: 0066-4189, 1545-4479. DOI:  
433 [10.1146/annurev-fluid-122414-034321](https://doi.org/10.1146/annurev-fluid-122414-034321). URL: [http://www.annualreviews.org/  
434 doi/10.1146/annurev-fluid-122414-034321](http://www.annualreviews.org/doi/10.1146/annurev-fluid-122414-034321) (visited on 11/24/2020).
- 435 [36] A. Marmarou, K. Shulman, and J. LaMorgese. “Compartmental Analysis of Compliance and Outflow  
436 Resistance of the Cerebrospinal Fluid System”. In: *Journal of Neurosurgery* 43.5 (Nov. 1975), pp. 523–534.  
437 ISSN: 0022-3085. DOI: [10.3171/jns.1975.43.5.0523](https://doi.org/10.3171/jns.1975.43.5.0523). pmid: 1181384.
- 438 [37] Andro Mikelic and Willi Jäger. “On The Interface Boundary Condition of Beavers, Joseph, and Saffman”.  
439 In: *SIAM Journal on Applied Mathematics* 60.4 (Jan. 2000), pp. 1111–1127. ISSN: 0036-1399, 1095-712X.  
440 DOI: [10.1137/S003613999833678X](https://doi.org/10.1137/S003613999833678X). URL: [http://epubs.siam.org/doi/10.1137/  
441 S003613999833678X](http://epubs.siam.org/doi/10.1137/S003613999833678X) (visited on 11/26/2020).
- 442 [38] Charles Nicholson. “Diffusion and related transport mechanisms in brain tissue”. In: *Reports on progress in  
443 Physics* 64.7 (2001), p. 815.

- 444 [39] Ricardo Oyarzúa and Ricardo Ruiz-Baier. “Locking-Free Finite Element Methods for Poroelasticity”. In:  
445 *SIAM Journal on Numerical Analysis* 54.5 (Jan. 2016), pp. 2951–2973. ISSN: 0036-1429, 1095-7170. DOI:  
446 [10.1137/15M1050082](https://doi.org/10.1137/15M1050082). URL: <http://epubs.siam.org/doi/10.1137/15M1050082> (visited  
447 on 11/26/2020).
- 448 [40] Soroush Heidari Pahlavian et al. “Regional Quantification of Brain Tissue Strain Using Displacement-  
449 Encoding With Stimulated Echoes Magnetic Resonance Imaging”. In: *Journal of Biomechanical Engineering*  
450 140.8 (Aug. 1, 2018), p. 081010. ISSN: 0148-0731, 1528-8951. DOI: [10.1115/1.4040227](https://doi.org/10.1115/1.4040227). URL: [https://  
451 asmedigitalcollection.asme.org/biomechanical/article/doi/10.1115/1.  
452 4040227/425183/Regional-Quantification-of-Brain-Tissue-Strain](https://asmedigitalcollection.asme.org/biomechanical/article/doi/10.1115/1.4040227/425183/Regional-Quantification-of-Brain-Tissue-Strain) (visited on  
453 10/01/2020).
- 454 [41] William M Pardridge. “Drug transport in brain via the cerebrospinal fluid”. In: *Fluids and Barriers of the*  
455 *CNS* 8.1 (2011), pp. 1–4.
- 456 [42] B P Poncelet et al. “Brain Parenchyma Motion: Measurement with Cine Echo-Planar MR Imaging.” In:  
457 *Radiology* 185.3 (Dec. 1992), pp. 645–651. ISSN: 0033-8419, 1527-1315. DOI: [10.1148/radiology.  
458 185.3.1438740](https://doi.org/10.1148/radiology.185.3.1438740). URL: [http://pubs.rsna.org/doi/10.1148/radiology.185.3.  
459 1438740](http://pubs.rsna.org/doi/10.1148/radiology.185.3.1438740) (visited on 11/12/2020).
- 460 [43] Leonardo Rangel-Castillo, Shankar Gopinath, and Claudia S. Robertson. “Management of Intracranial  
461 Hypertension”. In: *Neurologic clinics* 26.2 (May 2008), pp. 521–541. ISSN: 0733-8619. DOI: [10.1016/  
462 j.ncl.2008.02.003](https://doi.org/10.1016/j.ncl.2008.02.003). pmid: 18514825. URL: [https://www.ncbi.nlm.nih.gov/pmc/  
463 articles/PMC2452989/](https://www.ncbi.nlm.nih.gov/pmc/articles/PMC2452989/) (visited on 01/03/2021).
- 464 [44] Geir Ringstad et al. “Non-invasive assessment of pulsatile intracranial pressure with phase-contrast magnetic  
465 resonance imaging”. In: *PloS one* 12.11 (2017), e0188896.
- 466 [45] Ricardo Ruiz-Baier et al. “The Biot–Stokes coupling using total pressure: Formulation, analysis and applica-  
467 tion to interfacial flow in the eye”. In: *Computer Methods in Applied Mechanics and Engineering* 389 (2022),  
468 p. 114384.
- 469 [46] P. G. Saffman. “On the Boundary Condition at the Surface of a Porous Medium”. In: *Studies in Applied*  
470 *Mathematics* 50.2 (1971), pp. 93–101. ISSN: 1467-9590. DOI: [10.1002/sapm197150293](https://doi.org/10.1002/sapm197150293). URL: [https://  
471 onlinelibrary.wiley.com/doi/abs/10.1002/sapm197150293](https://onlinelibrary.wiley.com/doi/abs/10.1002/sapm197150293) (visited on 11/27/2020).
- 472 [47] Julia J Schubert et al. “Dynamic 11C-PIB PET shows cerebrospinal fluid flow alterations in Alzheimer disease  
473 and multiple sclerosis”. In: *Journal of Nuclear Medicine* 60.10 (2019), pp. 1452–1460.
- 474 [48] Jacob Jan Sloots, Geert Jan Biessels, and Jaco JM Zwanenburg. “Cardiac and respiration-induced brain  
475 deformations in humans quantified with high-field MRI”. In: *Neuroimage* 210 (2020), p. 116581.
- 476 [49] Joshua H. Smith and Joseph A.C. Humphrey. “Interstitial Transport and Transvascular Fluid Exchange  
477 during Infusion into Brain and Tumor Tissue”. In: *Microvascular Research* 73.1 (Jan. 2007), pp. 58–73.  
478 ISSN: 00262862. DOI: [10.1016/j.mvr.2006.07.001](https://doi.org/10.1016/j.mvr.2006.07.001). URL: [https://linkinghub.elsevier.  
479 com/retrieve/pii/S0026286206000896](https://linkinghub.elsevier.com/retrieve/pii/S0026286206000896) (visited on 05/25/2020).
- 480 [50] Hannes Stephensen, Magnus Tisell, and Carsten Wikkelsö. “There Is No Transmantle Pressure Gradient in  
481 Communicating or Noncommunicating Hydrocephalus”. In: *Neurosurgery* 50.4 (Apr. 1, 2002), pp. 763–773.  
482 ISSN: 0148-396X, 1524-4040. DOI: [10.1097/00006123-200204000-00016](https://doi.org/10.1097/00006123-200204000-00016). URL: [https://  
483 academic.oup.com/neurosurgery/article/50/4/763/2757180](https://academic.oup.com/neurosurgery/article/50/4/763/2757180) (visited on 04/17/2020).
- 484 [51] Brian Sweetman et al. “Three-Dimensional Computational Prediction of Cerebrospinal Fluid Flow in the  
485 Human Brain”. In: *Computers in biology and medicine* 41.2 (Feb. 2011), pp. 67–75. ISSN: 0010-4825. DOI:  
486 [10.1016/j.compbiomed.2010.12.001](https://doi.org/10.1016/j.compbiomed.2010.12.001). pmid: 21215965. URL: [https://www.ncbi.nlm.  
487 nih.gov/pmc/articles/PMC3050671/](https://www.ncbi.nlm.nih.gov/pmc/articles/PMC3050671/) (visited on 08/27/2020).



- 488 [52] Rong-Wen Tain et al. “Determination of Cranio-Spinal Canal Compliance Distribution by MRI: Method-  
489 ology and Early Application in Idiopathic Intracranial Hypertension”. In: *Journal of magnetic resonance*  
490 *imaging : JMRI* 34.6 (Dec. 2011), pp. 1397–1404. ISSN: 1053-1807. DOI: [10.1002/jmri.22799](https://doi.org/10.1002/jmri.22799). pmid:  
491 [21972076](https://pubmed.ncbi.nlm.nih.gov/21972076/). URL: <https://www.ncbi.nlm.nih.gov/pmc/articles/PMC3221868/> (visited  
492 on 11/16/2020).
- 493 [53] Kevin M. Tangen et al. “CNS Wide Simulation of Flow Resistance and Drug Transport Due to Spinal  
494 Microanatomy”. In: *Journal of Biomechanics* 48.10 (July 2015), pp. 2144–2154. ISSN: 00219290. DOI:  
495 [10.1016/j.jbiomech.2015.02.018](https://doi.org/10.1016/j.jbiomech.2015.02.018). URL: [https://linkinghub.elsevier.com/  
496 retrieve/pii/S0021929015000974](https://linkinghub.elsevier.com/retrieve/pii/S0021929015000974) (visited on 11/13/2020).
- 497 [54] Brett Tully and Yiannis Ventikos. “Coupling Poroelasticity and CFD for Cerebrospinal Fluid Hydrodynamics”.  
498 In: *IEEE Transactions on Biomedical Engineering* 56.6 (June 2009), pp. 1644–1651. ISSN: 0018-9294,  
499 1558-2531. DOI: [10.1109/TBME.2009.2016427](https://doi.org/10.1109/TBME.2009.2016427). URL: [https://ieeexplore.ieee.org/  
500 document/4801989/](https://ieeexplore.ieee.org/document/4801989/) (visited on 11/13/2020).
- 501 [55] Erika J. Ulbrich et al. “Normative MR Cervical Spinal Canal Dimensions”. In: *Radiology* 271.1 (Apr.  
502 2014), pp. 172–182. ISSN: 0033-8419, 1527-1315. DOI: [10.1148/radiol.13120370](https://doi.org/10.1148/radiol.13120370). URL: [http:  
503 //pubs.rsna.org/doi/10.1148/radiol.13120370](http://pubs.rsna.org/doi/10.1148/radiol.13120370) (visited on 11/13/2020).
- 504 [56] Mårten Unnerbäck, Johnny T. Ottesen, and Peter Reinstrup. “ICP Curve Morphology and Intracranial  
505 Flow-Volume Changes: A Simultaneous ICP and Cine Phase Contrast MRI Study in Humans”. In: *Acta*  
506 *Neurochirurgica* 160.2 (Feb. 2018), pp. 219–224. ISSN: 0001-6268, 0942-0940. DOI: [10.1007/s00701-  
507 017-3435-2](https://doi.org/10.1007/s00701-017-3435-2). URL: <http://link.springer.com/10.1007/s00701-017-3435-2> (visited  
508 on 06/02/2020).
- 509 [57] Lars Magnus Valnes and Jakob Schreiner. *Surface Volume Meshing Toolkit (SVMTK)*. 2020. URL: [https:  
510 //github.com/SVMTK/SVMTK](https://github.com/SVMTK/SVMTK).
- 511 [58] John C. Vardakis et al. “Fluid–Structure Interaction for Highly Complex, Statistically Defined, Biologi-  
512 cal Media: Homogenisation and a 3D Multi-Compartmental Poroelastic Model for Brain Biomechanics”.  
513 In: *Journal of Fluids and Structures* 91 (Nov. 2019), p. 102641. ISSN: 08899746. DOI: [10.1016/j.  
514 jfluidstructs.2019.04.008](https://doi.org/10.1016/j.jfluidstructs.2019.04.008). URL: [https://linkinghub.elsevier.com/retrieve/  
515 pii/S0889974618308922](https://linkinghub.elsevier.com/retrieve/pii/S0889974618308922) (visited on 11/13/2020).
- 516 [59] Vegard Vinje et al. “Respiratory Influence on Cerebrospinal Fluid Flow – a Computational Study Based on  
517 Long-Term Intracranial Pressure Measurements”. In: *Scientific Reports* 9.1 (Dec. 2019), p. 9732. ISSN: 2045-  
518 2322. DOI: [10.1038/s41598-019-46055-5](https://doi.org/10.1038/s41598-019-46055-5). URL: [http://www.nature.com/articles/  
519 s41598-019-46055-5](http://www.nature.com/articles/s41598-019-46055-5) (visited on 03/30/2020).
- 520 [60] Mark E Wagshul, Per K Eide, and Joseph R Madsen. “The Pulsating Brain: A Review of Experimental  
521 and Clinical Studies of Intracranial Pulsatility”. In: *Fluids and Barriers of the CNS* 8.1 (Dec. 2011), p. 5.  
522 ISSN: 2045-8118. DOI: [10.1186/2045-8118-8-5](https://doi.org/10.1186/2045-8118-8-5). URL: [https://fluidsbarrierscns.  
523 biomedcentral.com/articles/10.1186/2045-8118-8-5](https://fluidsbarrierscns.biomedcentral.com/articles/10.1186/2045-8118-8-5) (visited on 04/22/2020).
- 524 [61] A. Wåhlin et al. “Assessment of Craniospinal Pressure-Volume Indices”. In: *AJNR. American journal of*  
525 *neuroradiology* 31.9 (Oct. 2010), pp. 1645–1650. ISSN: 1936-959X. DOI: [10.3174/ajnr.A2166](https://doi.org/10.3174/ajnr.A2166). pmid:  
526 [20595369](https://pubmed.ncbi.nlm.nih.gov/20595369/).
- 527 [62] Arkadiusz Ziółkowski et al. “Analysis of relative changes in pulse shapes of intracranial pressure and cerebral  
528 blood flow velocity”. In: *Physiological Measurement* 42.12 (2021), p. 125004.

## 529 Ethics approval and consent to participate

530 Not applicable.

## 531 **Consent for publication**

532 Not applicable.

## 533 **Availability of data and materials**

534 The code used to generate and analyze the datasets during the current study are openly available in repository [13].

## 535 **Competing interests**

536 The authors declare that they have no competing interests.

## 537 **Funding**

538 M. Causemann acknowledge the support of the Research Council of Norway via FRIPRO grant agreement #324239  
539 (EMIX). M. E. Rognes has received funding from the European Research Council (ERC) under the European Union's  
540 Horizon 2020 research and innovation programme under grant agreement 714892 (Waterscales).

541 The research presented in this paper has benefited from the Experimental Infrastructure for Exploration of  
542 Exascale Computing (eX3), which is financially supported by the Research Council of Norway under contract  
543 270053, as well as the national infrastructure for computational science in Norway, Sigma2.

## 544 **Author contributions**

545 M.C., V.V, and M.E.R. designed the computational model and conceived the numerical experiments. M.C. segmented  
546 and meshed the MR images. M.C. implemented the simulation algorithms and conducted the simulations. M.C., V.V,  
547 and M.E.R. analyzed and discussed the results. M.C. made the figures. M.C, V.V. and M.E.R. wrote the manuscript.  
548 All authors revised and approved the final manuscript.

## 549 **Supplementary Material**

### 550 **Mesh & time convergence**

551 A highly detailed mesh is required to adequately resolve the intricate geometry of the human brain and its environment.  
552 To ensure a sufficiently fine mesh, we uniformly refined our mesh twice and hence obtained three meshes with  
553 increasing resolution (coarse, mid and fine) (Figure 8). Computing the set of quantities of interest on all meshes  
554 reveals that the temporal pressure variation in the lateral ventricles and the spinal stroke volume do not change with  
555 the mesh resolution, while the aqueductal stroke volume and the peak aqueduct flow rate increase from the coarse to  
556 the mid resolution meshes, but remain almost constant in the next refinement stage. The peak displacement and  
557 peak transmante pressure gradient exhibit small decreases from the mid to fine resolution meshes, indicating that  
558 further mesh refinement may be desirable. However, given the small changes and limited computational resources,  
559 we consider the numerical error acceptable. Similarly, we conduct a time step refinement study on the fine resolution  
560 mesh, computing the quantities of interest using 80, 160 and 320 time steps per cardiac cycle. While the temporal  
561 pressure variations in the lateral ventricles and the spinal stroke volume again stay constant over time step refinement,  
562 the aqueduct stroke volume, the peak aqueduct flow rate, the peak displacement and the peak transmante pressure  
563 gradient slightly increase with the number of time steps.

### 564 **Intracranial Pressure with increased spinal compliance**

565 The ICP pressure curve of Model A (increased spinal compliance) shows a smaller nadir-to-peak amplitude compared  
566 to the standard model, but features multiple peaks (P1, P2, P3) per cardiac cycle (Figure 11).

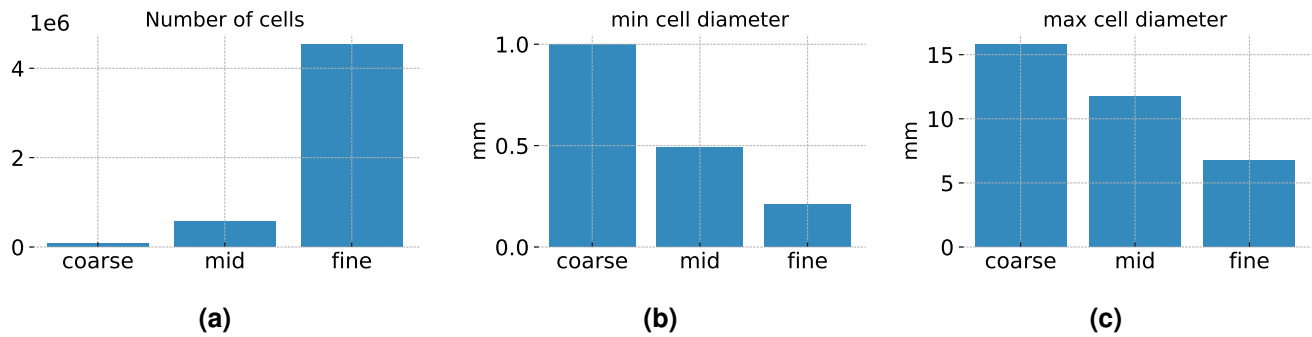

**Figure 8.** a) number of cells of the fine, mid and coarse resolution meshes generated by uniform refinement); b) minimal cell diameter of the meshes; c) maximal cell diameter of the meshes

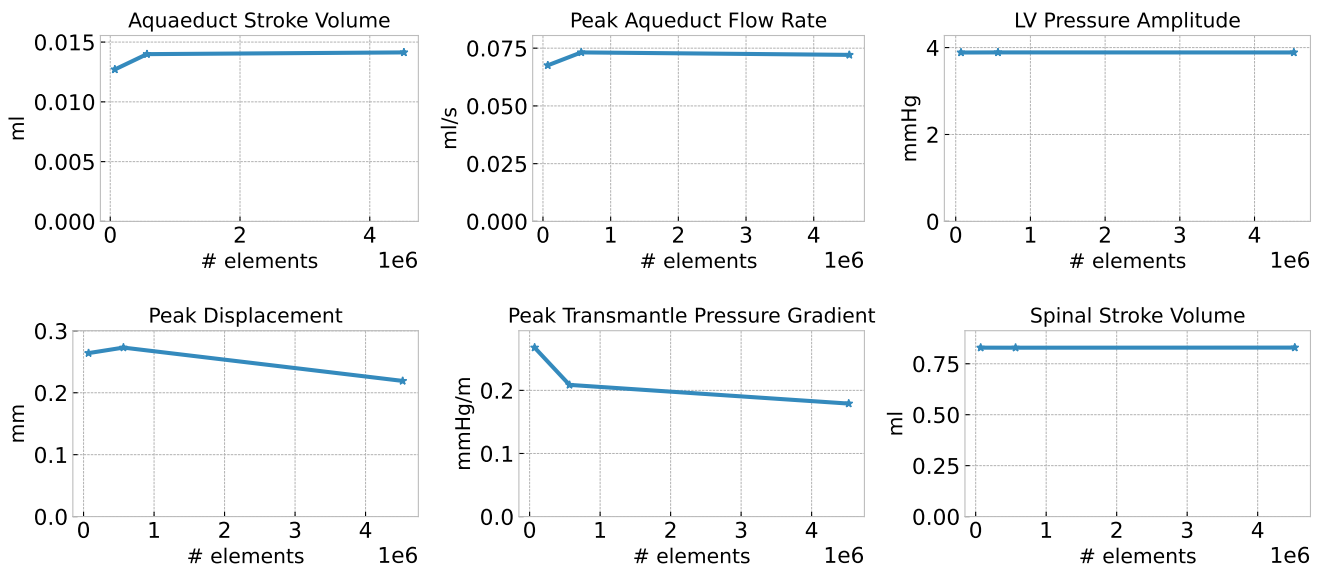

**Figure 9.** Quantities of interest computed for a sequence of uniformly refined meshes (coarse, mid, fine) with a fixed number of time steps (320 time steps per cardiac cycle).

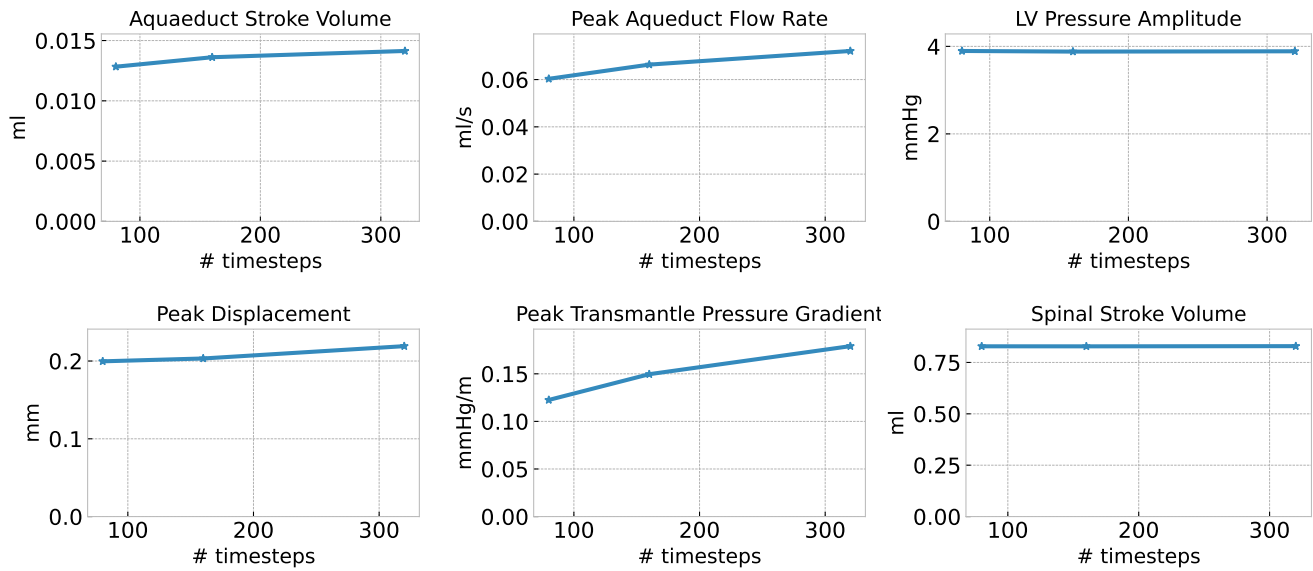

**Figure 10.** Quantities of interest computed for different numbers of time steps per cardiac cycle (80, 160, 320) on the fine mesh (uniformly refined twice).

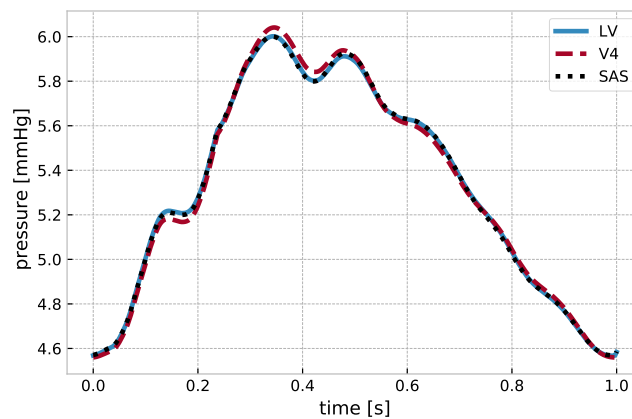

**Figure 11.** The ICP pressure curve in the lateral ventricles (LV) the fourth ventricle (V4) and the SAS of Model A (increased spinal compliance) shows multiple peaks per cardiac cycle (P1, P2, P3).
